# Supplementary material
Source: PubMed Central journal article supplement (PMC2819342)

**Design and Stereoselective Preparation of a New Class of Chiral  
Olefin Metathesis Catalysts and Application to Enantioselective  
Synthesis of Quebrachamine. Catalyst Development Inspired by  
Natural Product Synthesis**

Elizabeth S. Sattely,<sup>#</sup> Simon J. Meek,<sup>#</sup> Steven J. Malcolmson,<sup>#</sup>  
Richard R. Schrock,<sup>+</sup> and Amir H. Hoveyda<sup>#,\*</sup>

<sup>#</sup>*Department of Chemistry, Merkert Chemistry Center, Boston College  
Chestnut Hill, Massachusetts 02467*

<sup>+</sup>*Department of Chemistry, Massachusetts Institute of Technology  
Cambridge, Massachusetts 02139*

**SUPPORTING INFORMATION: PART B**

- <sup>1</sup>H and <sup>13</sup>C NMR spectra

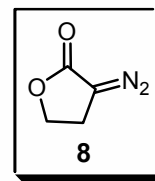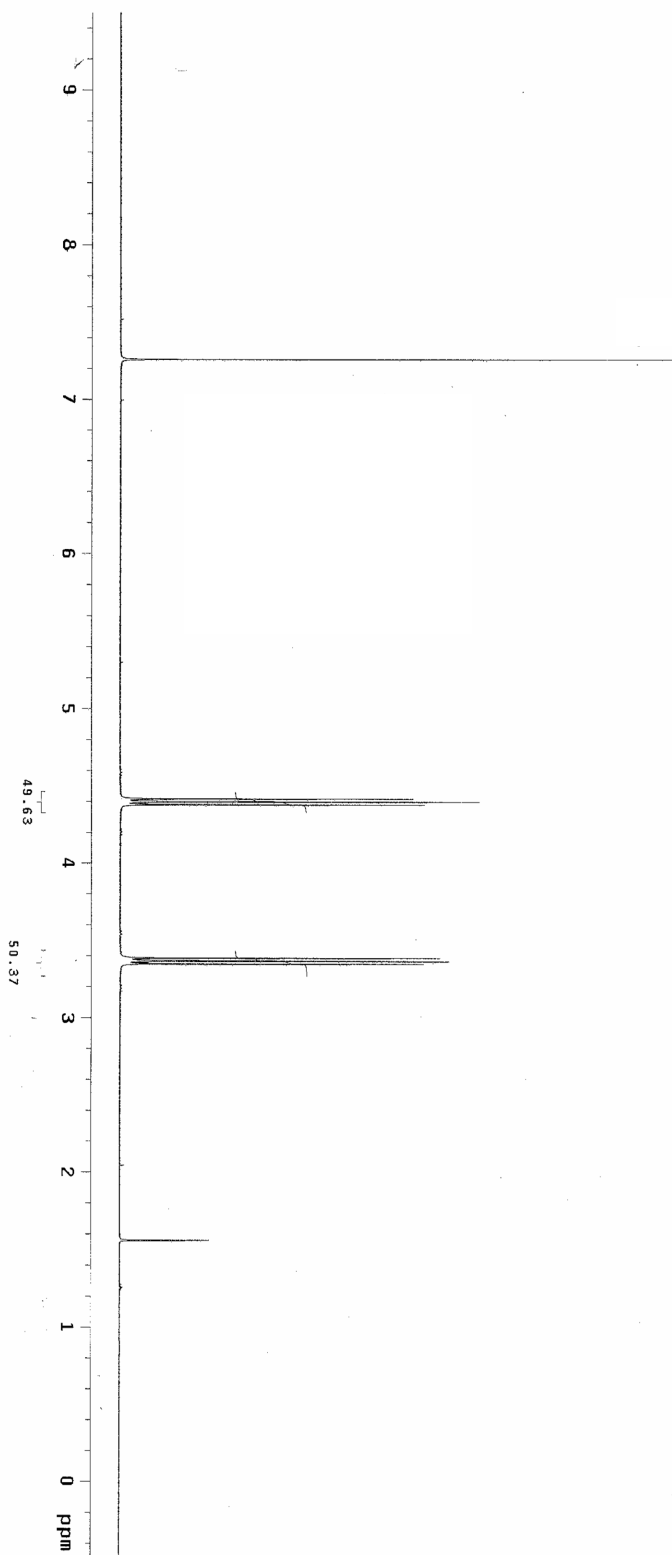

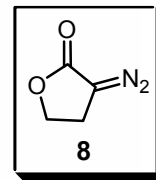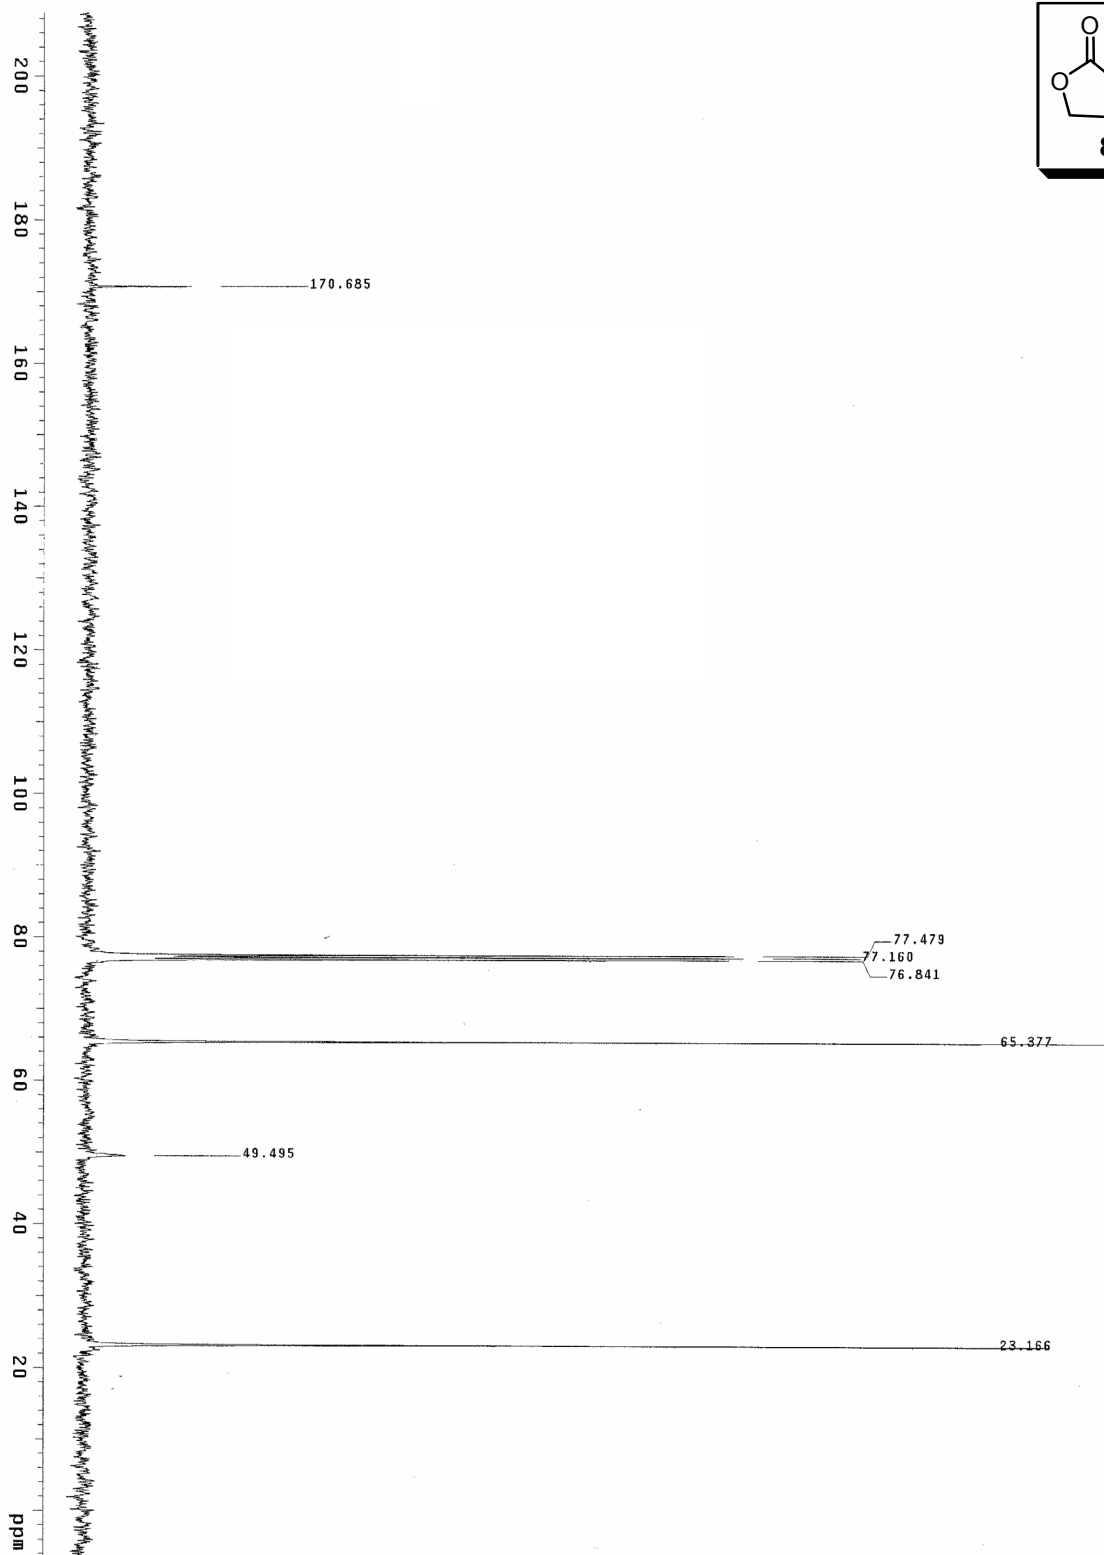

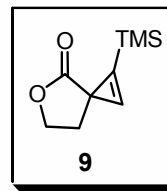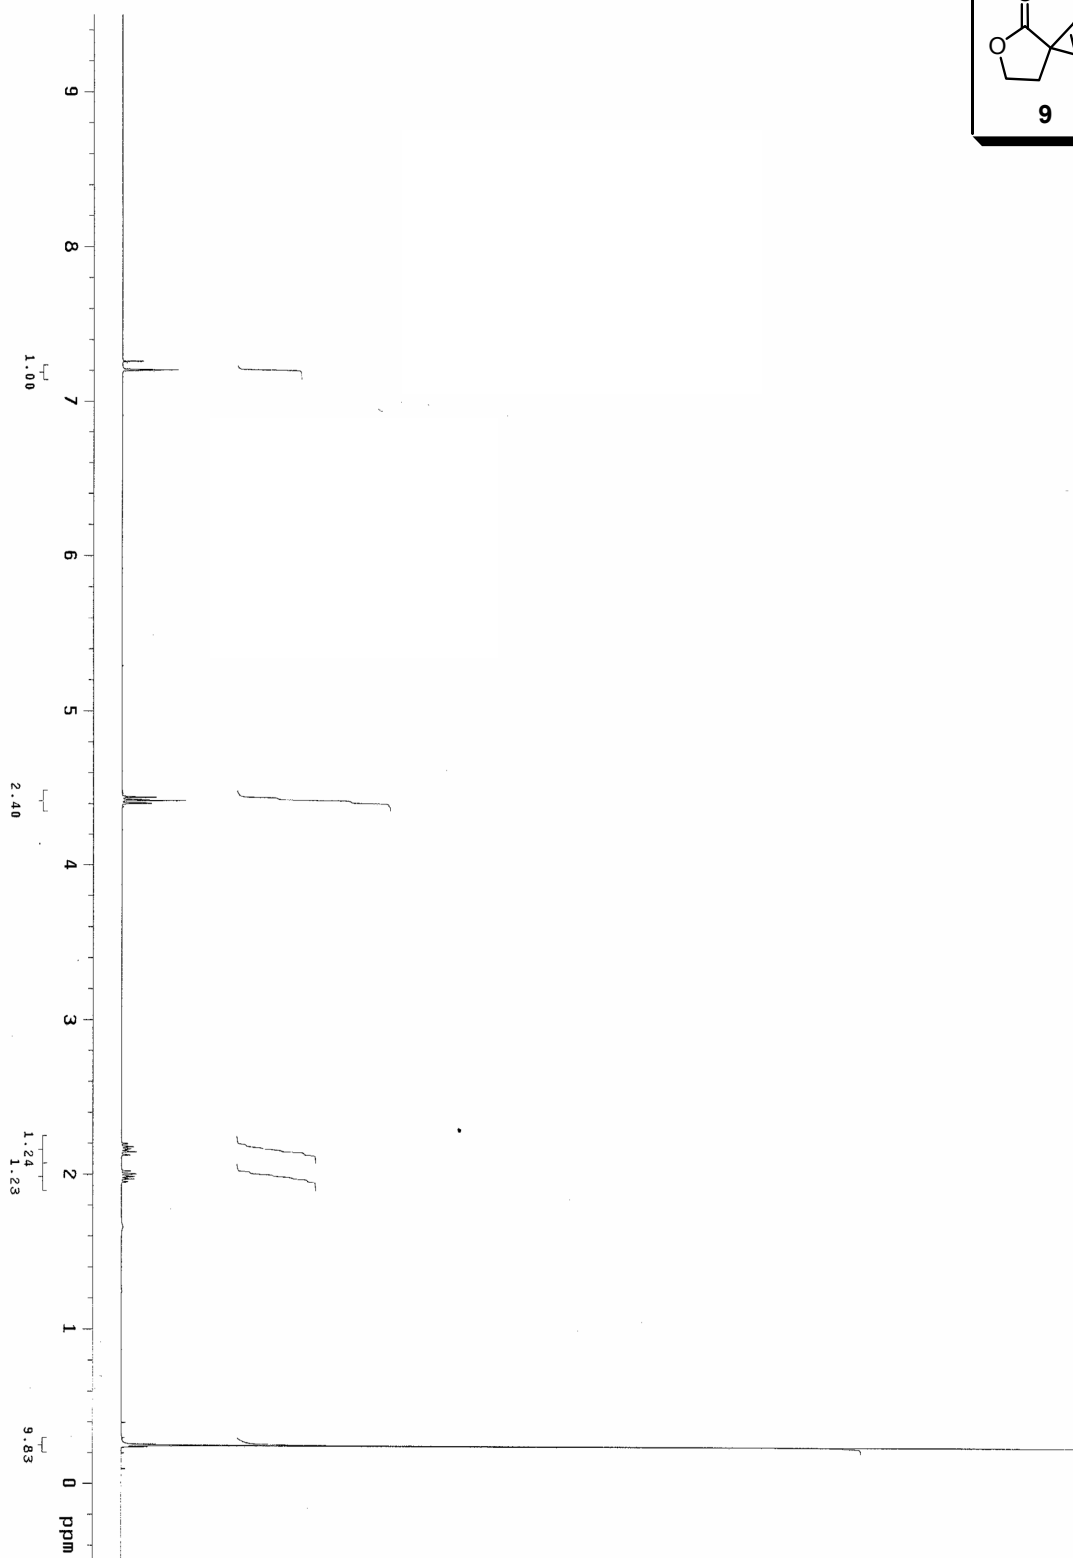

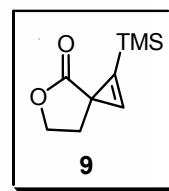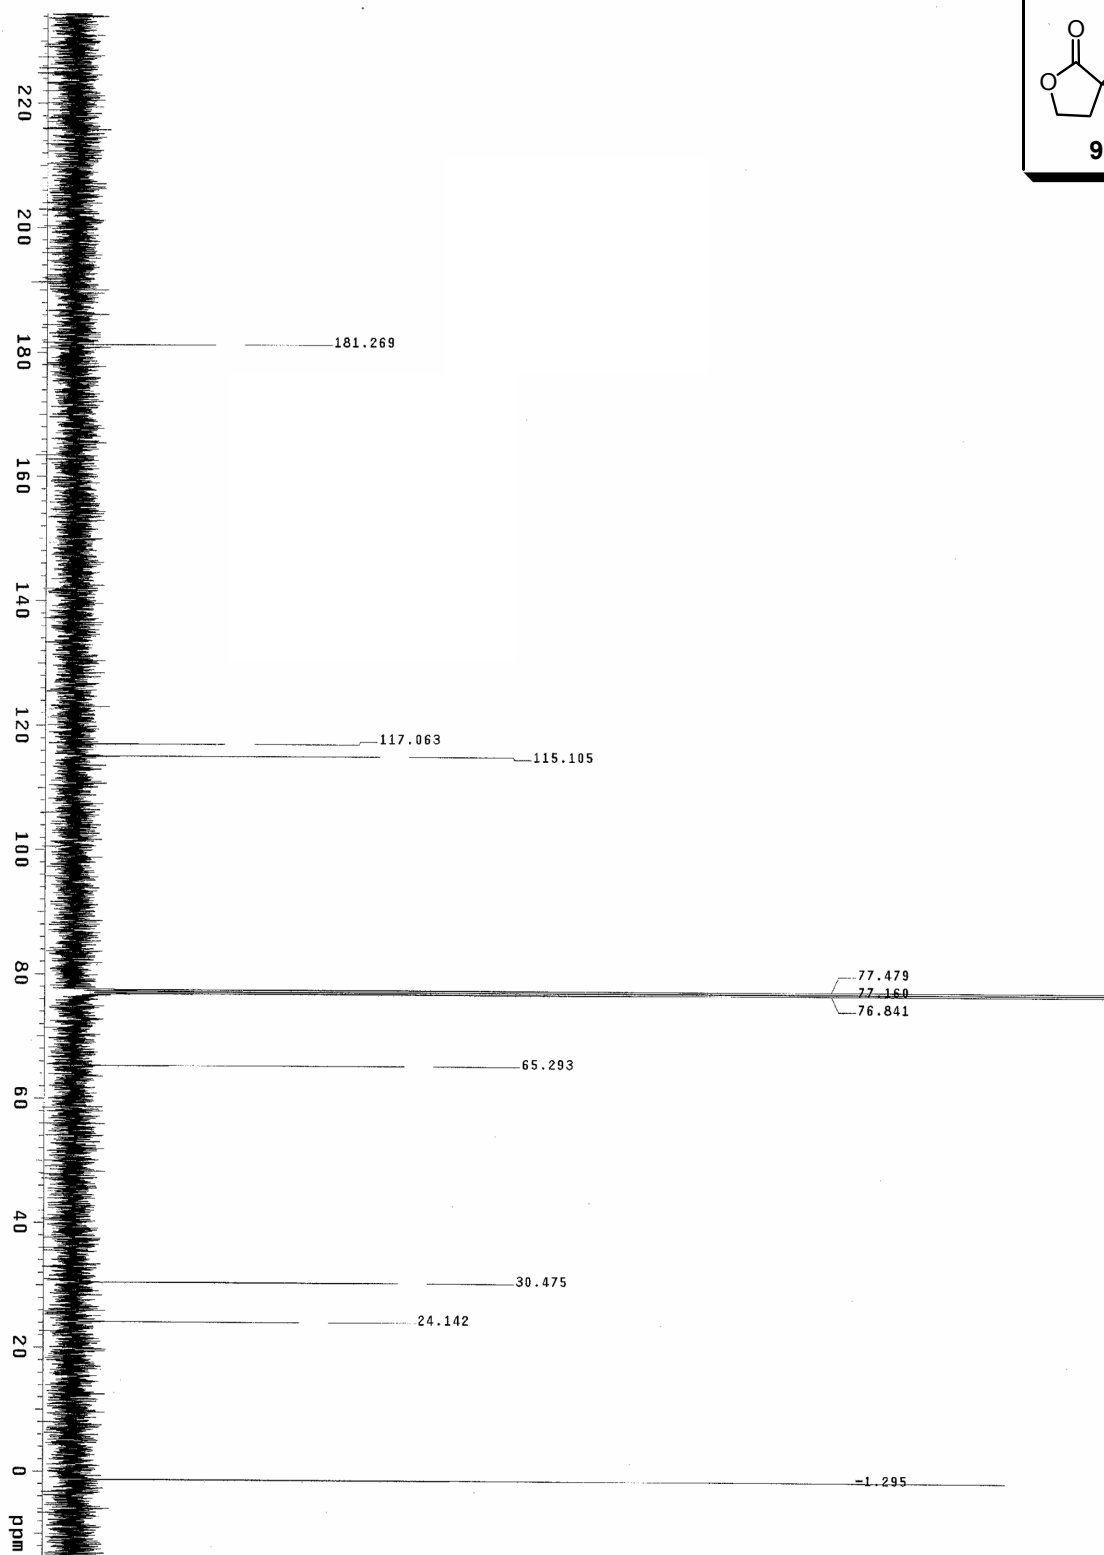

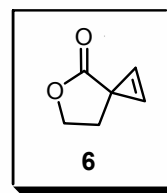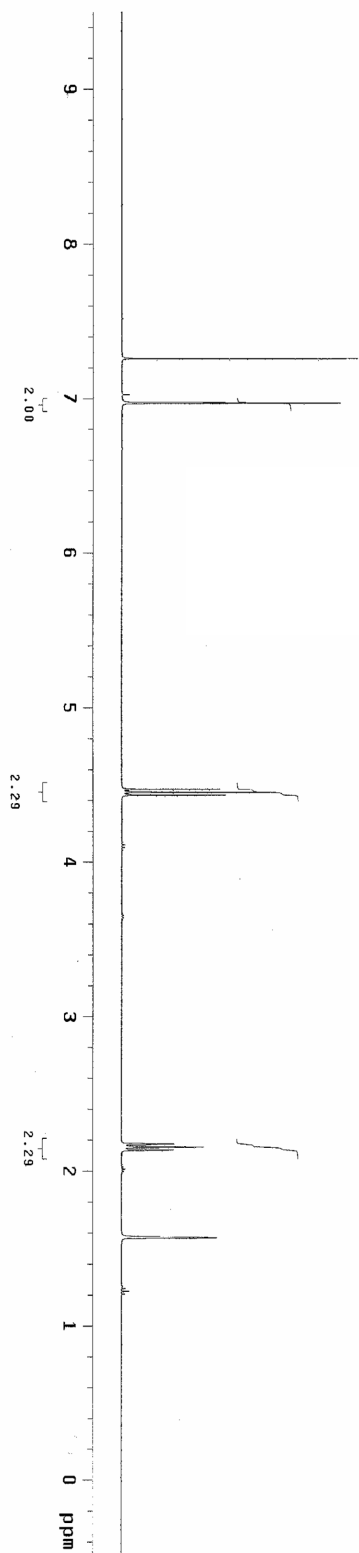

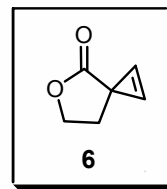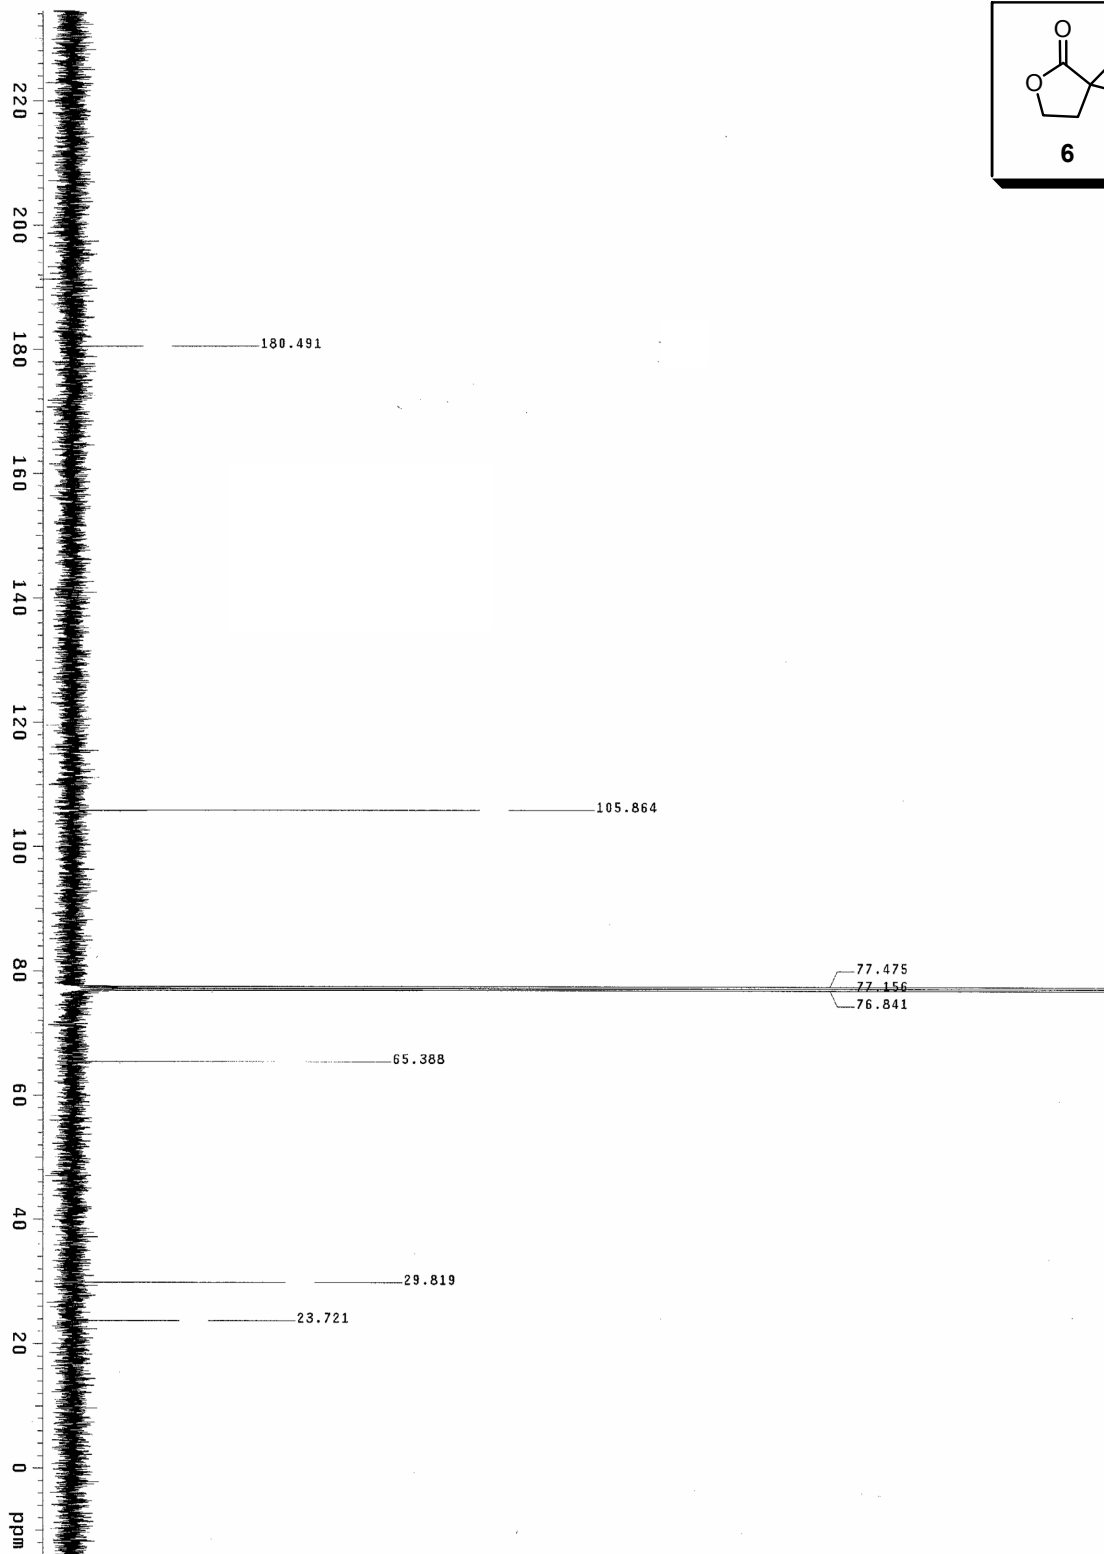

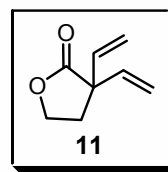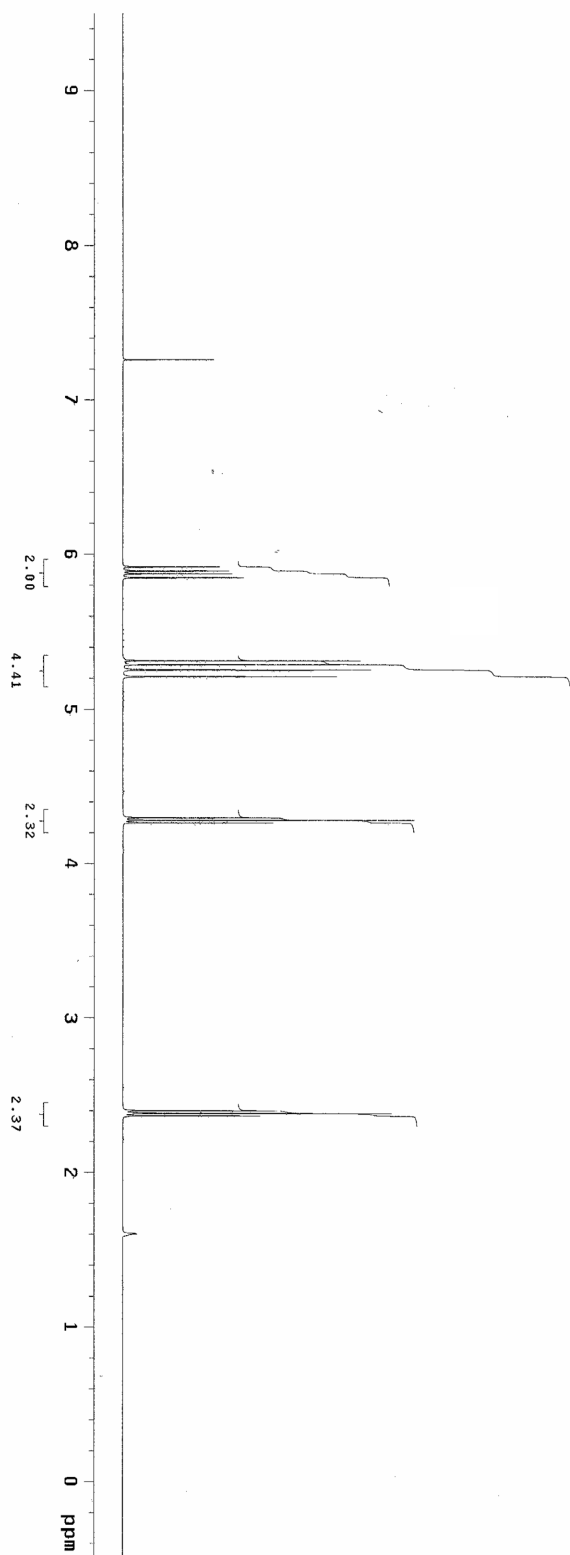



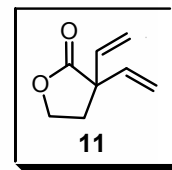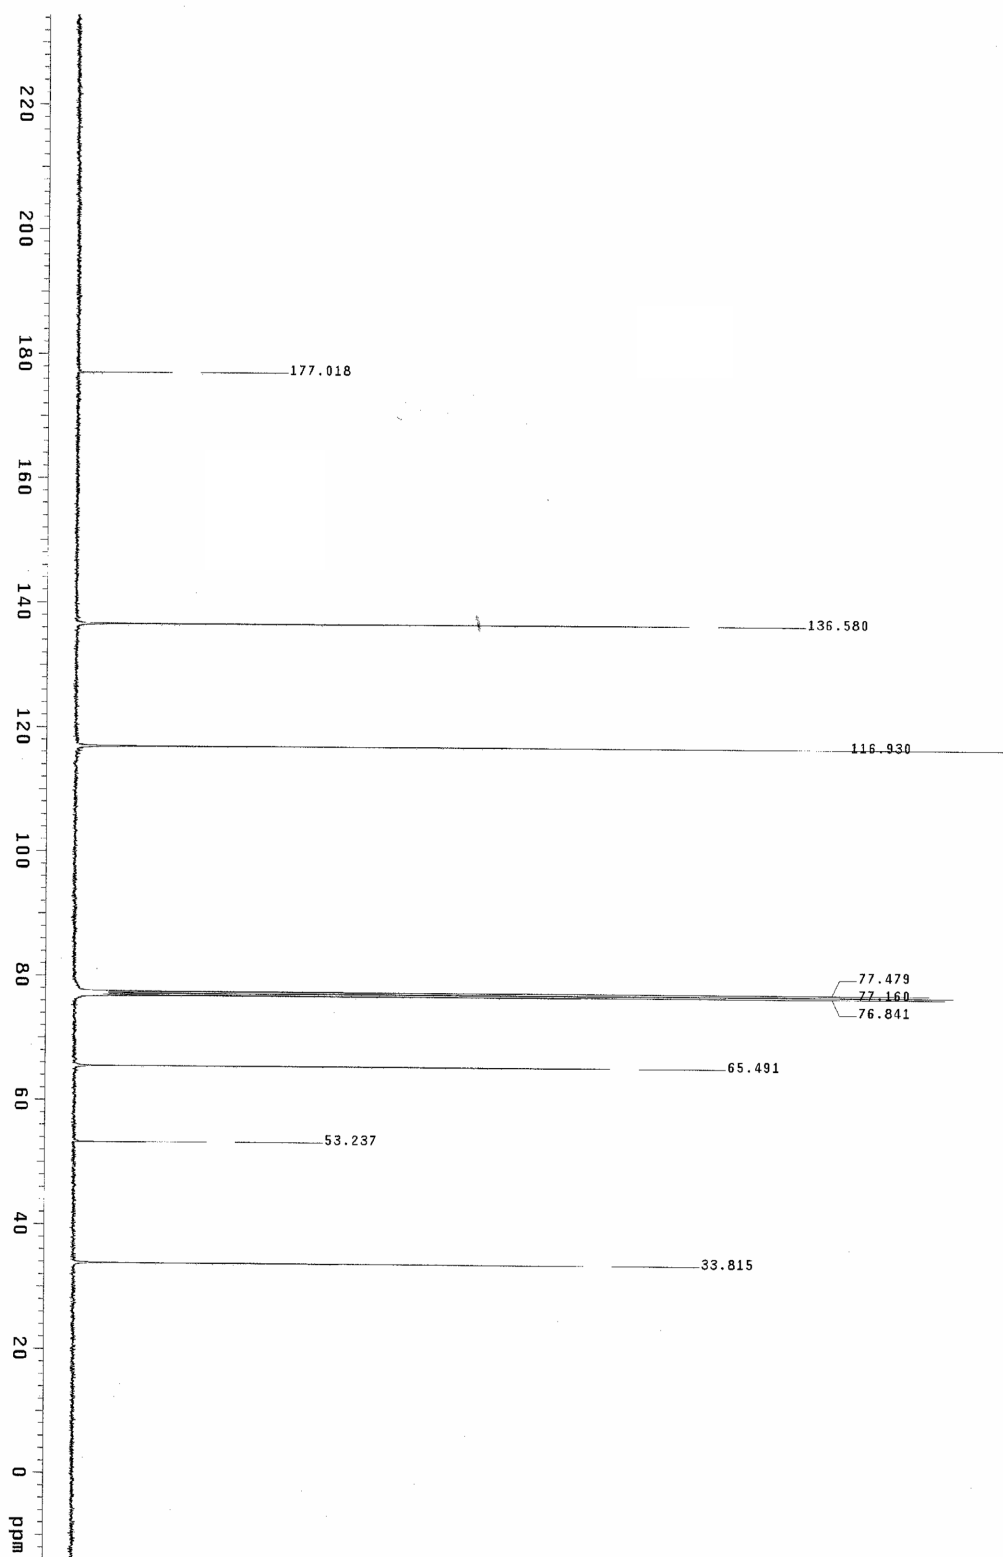

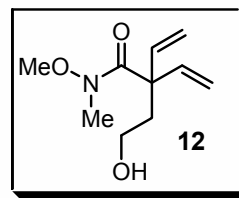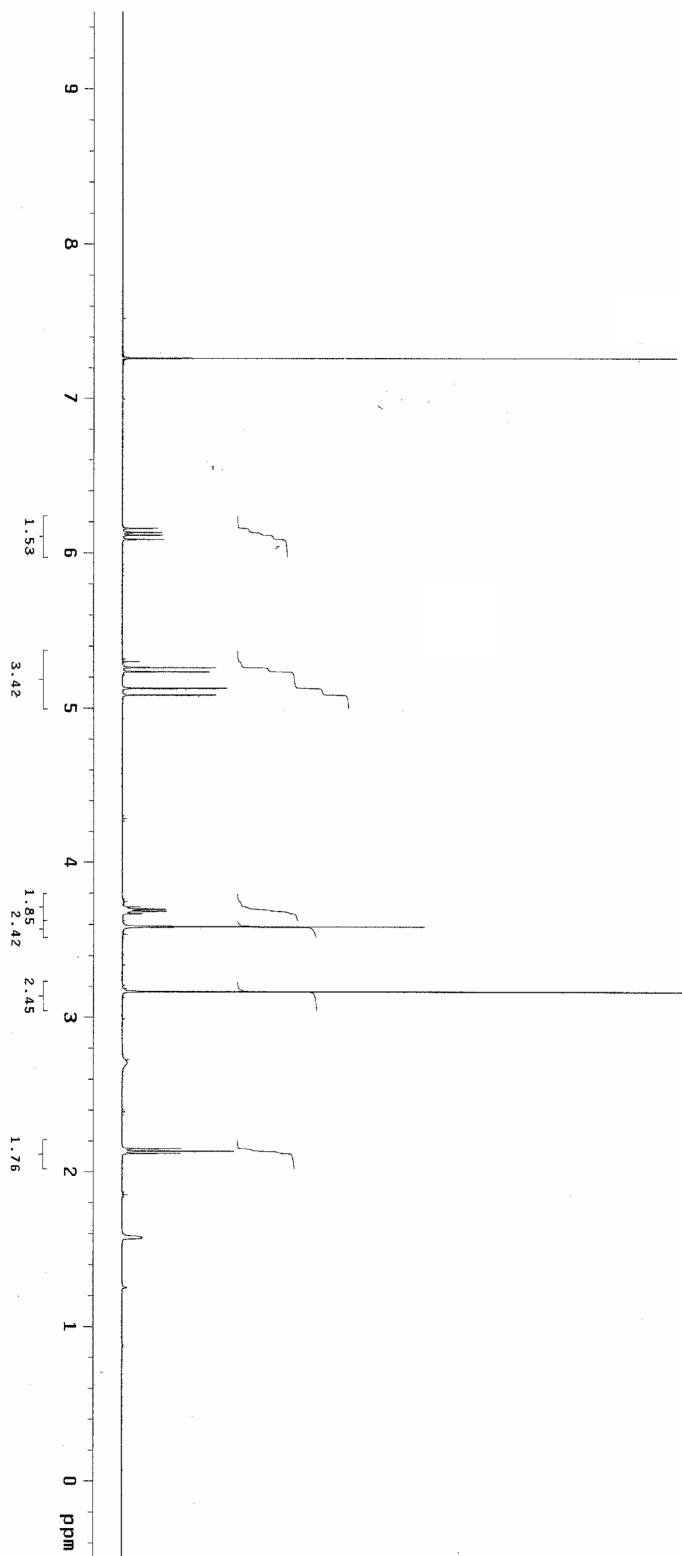

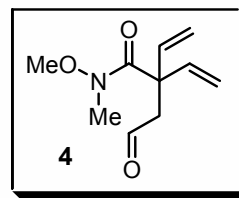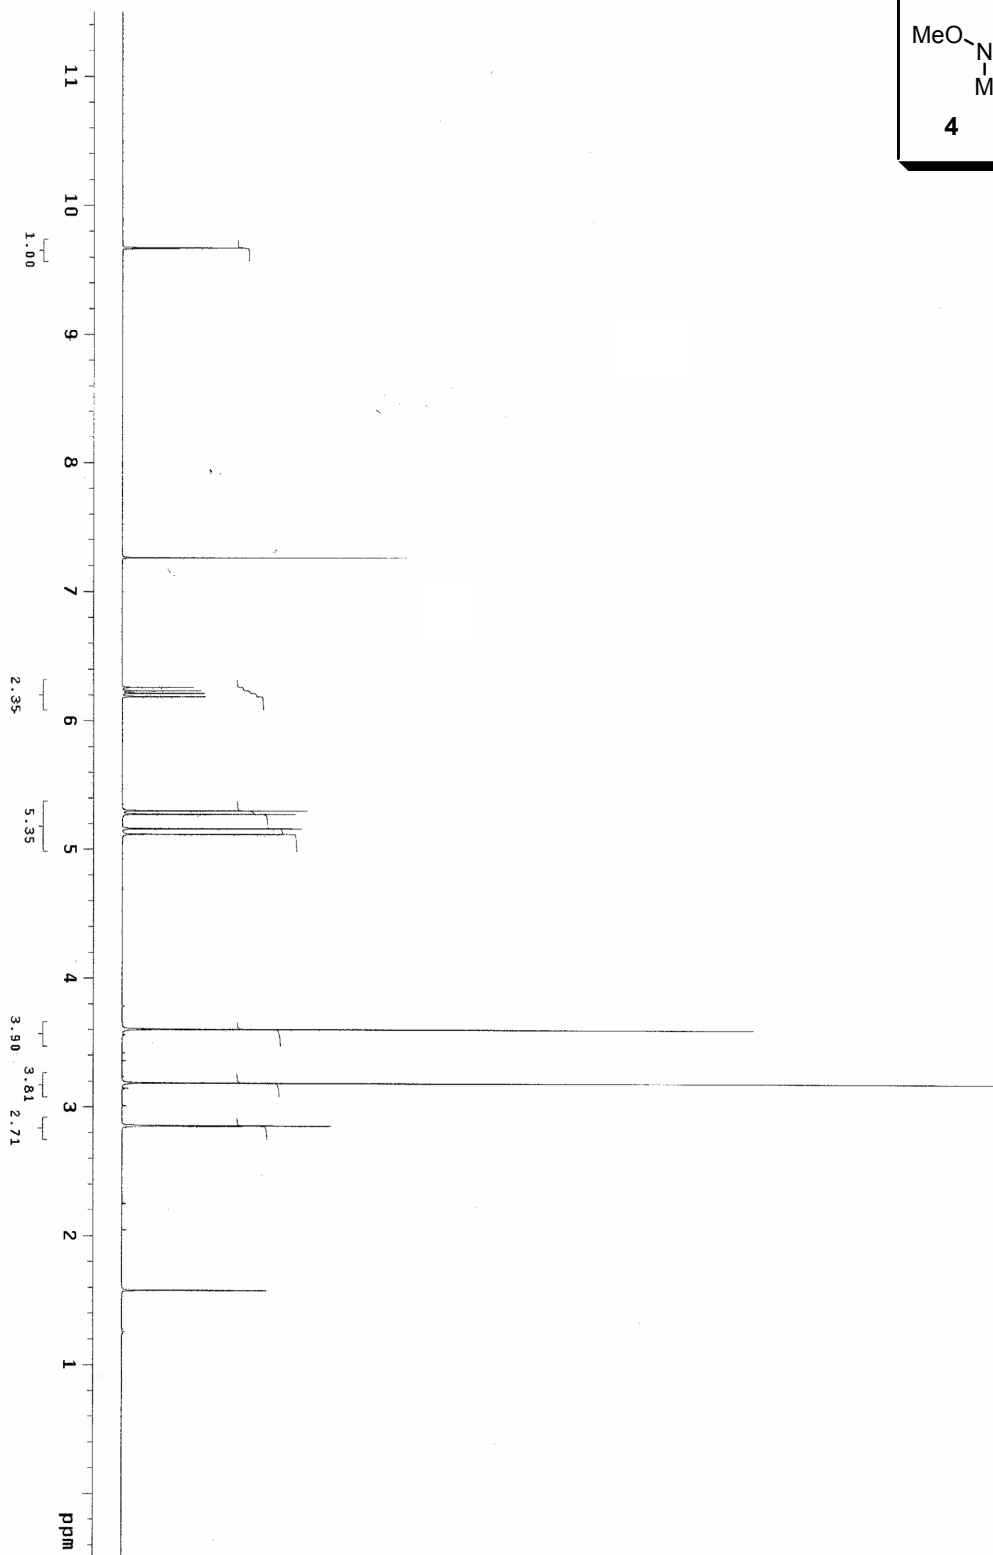

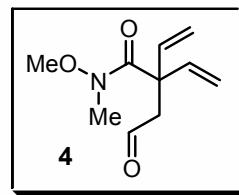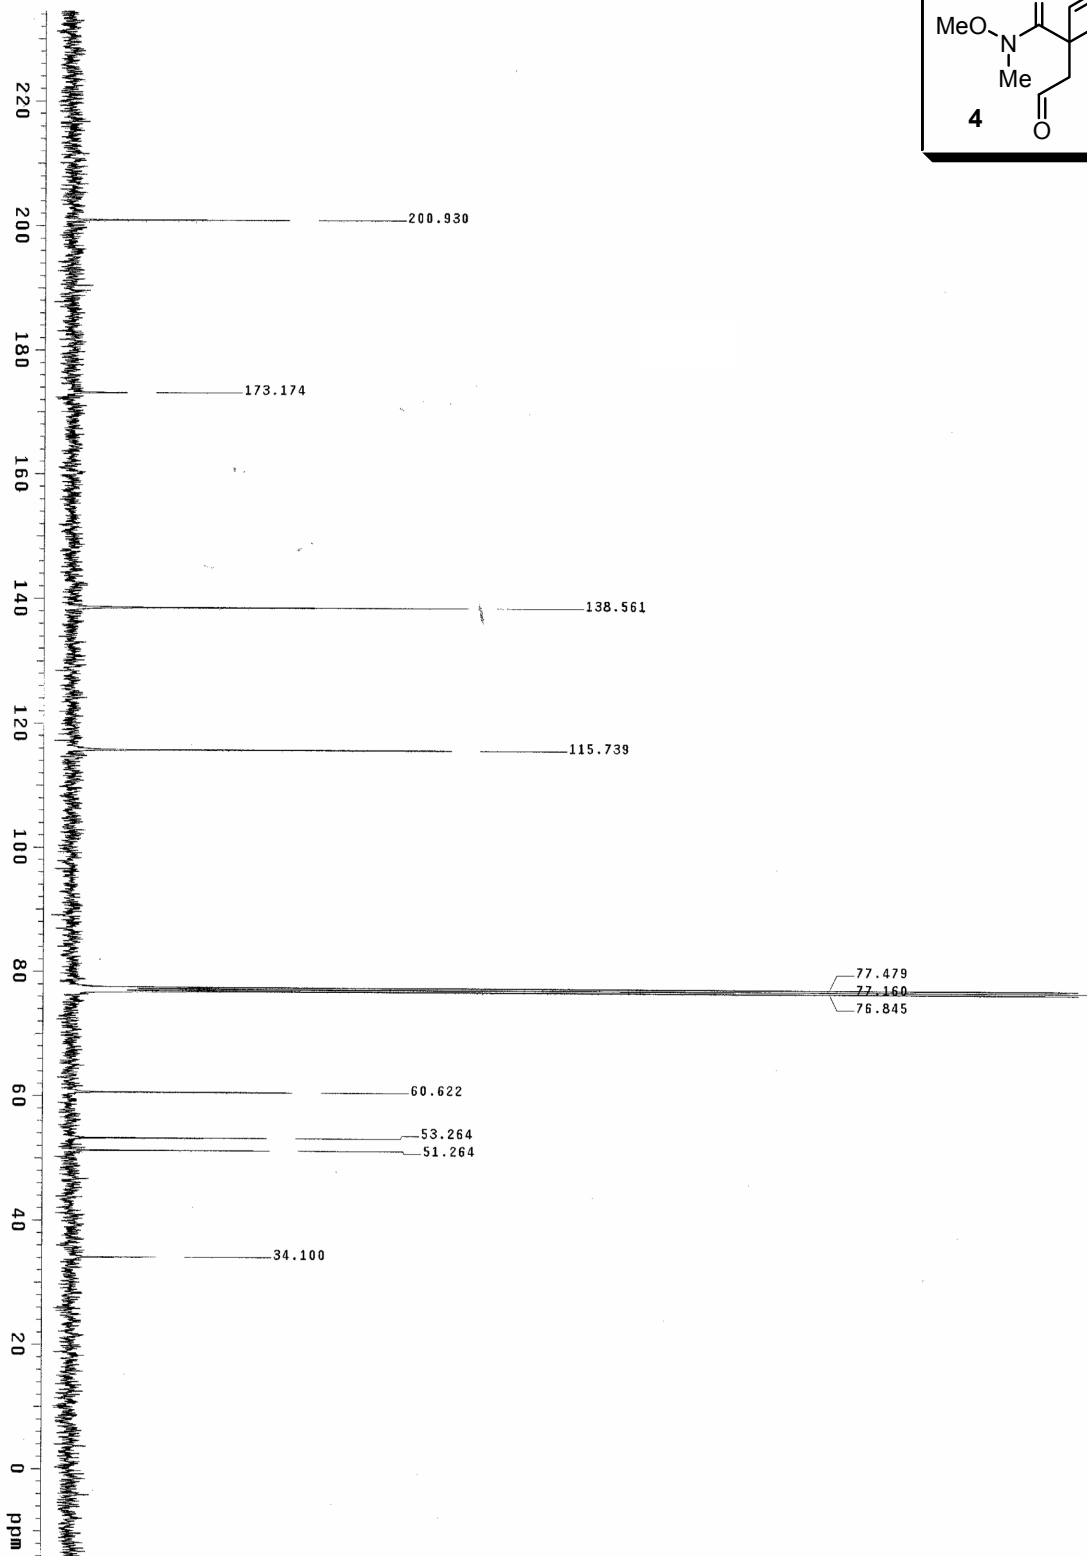

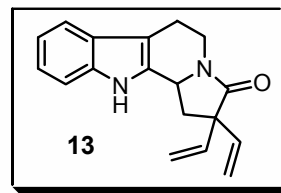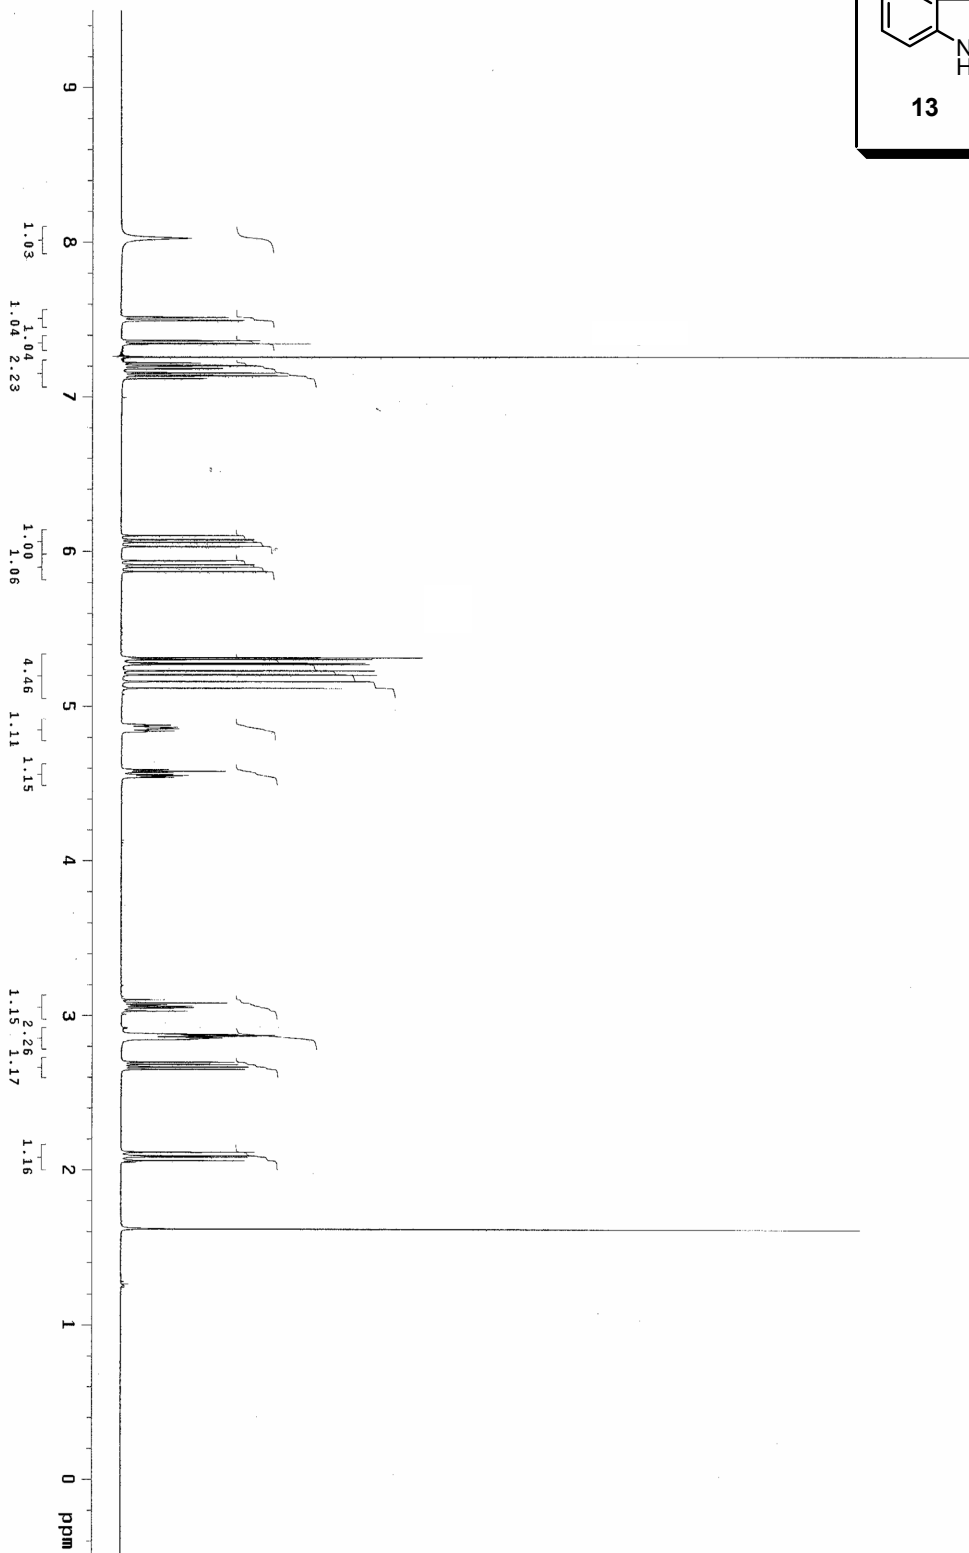

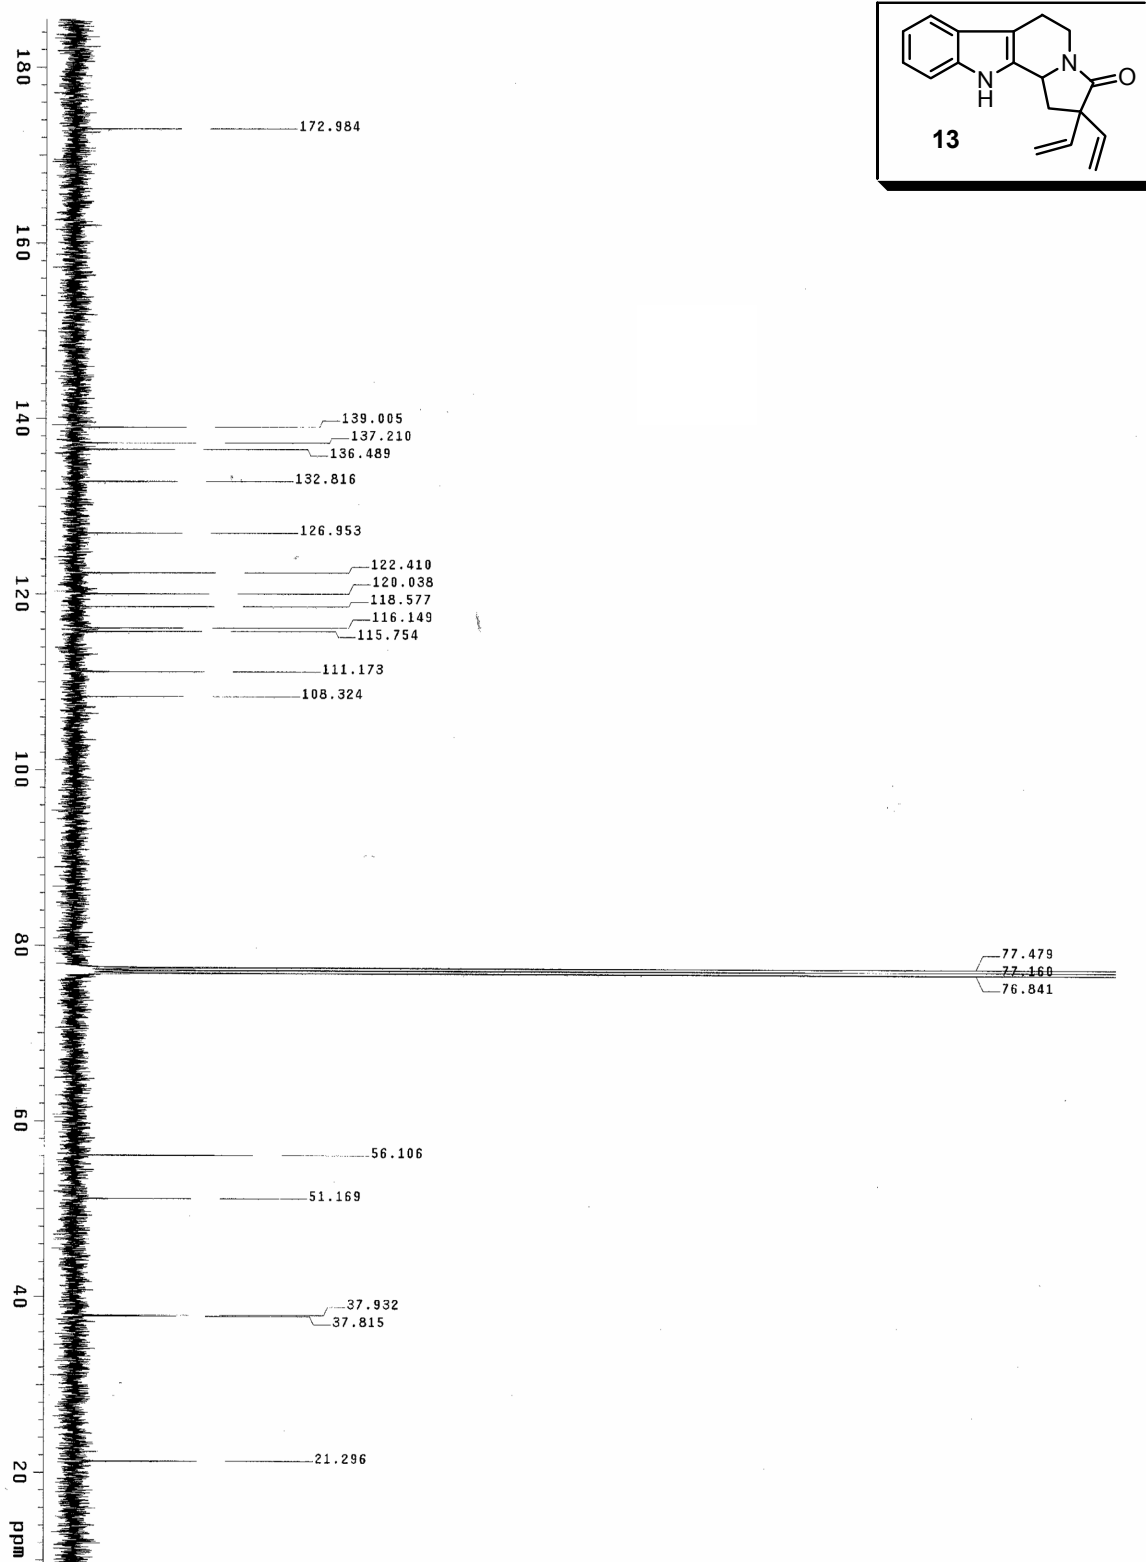

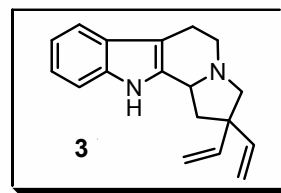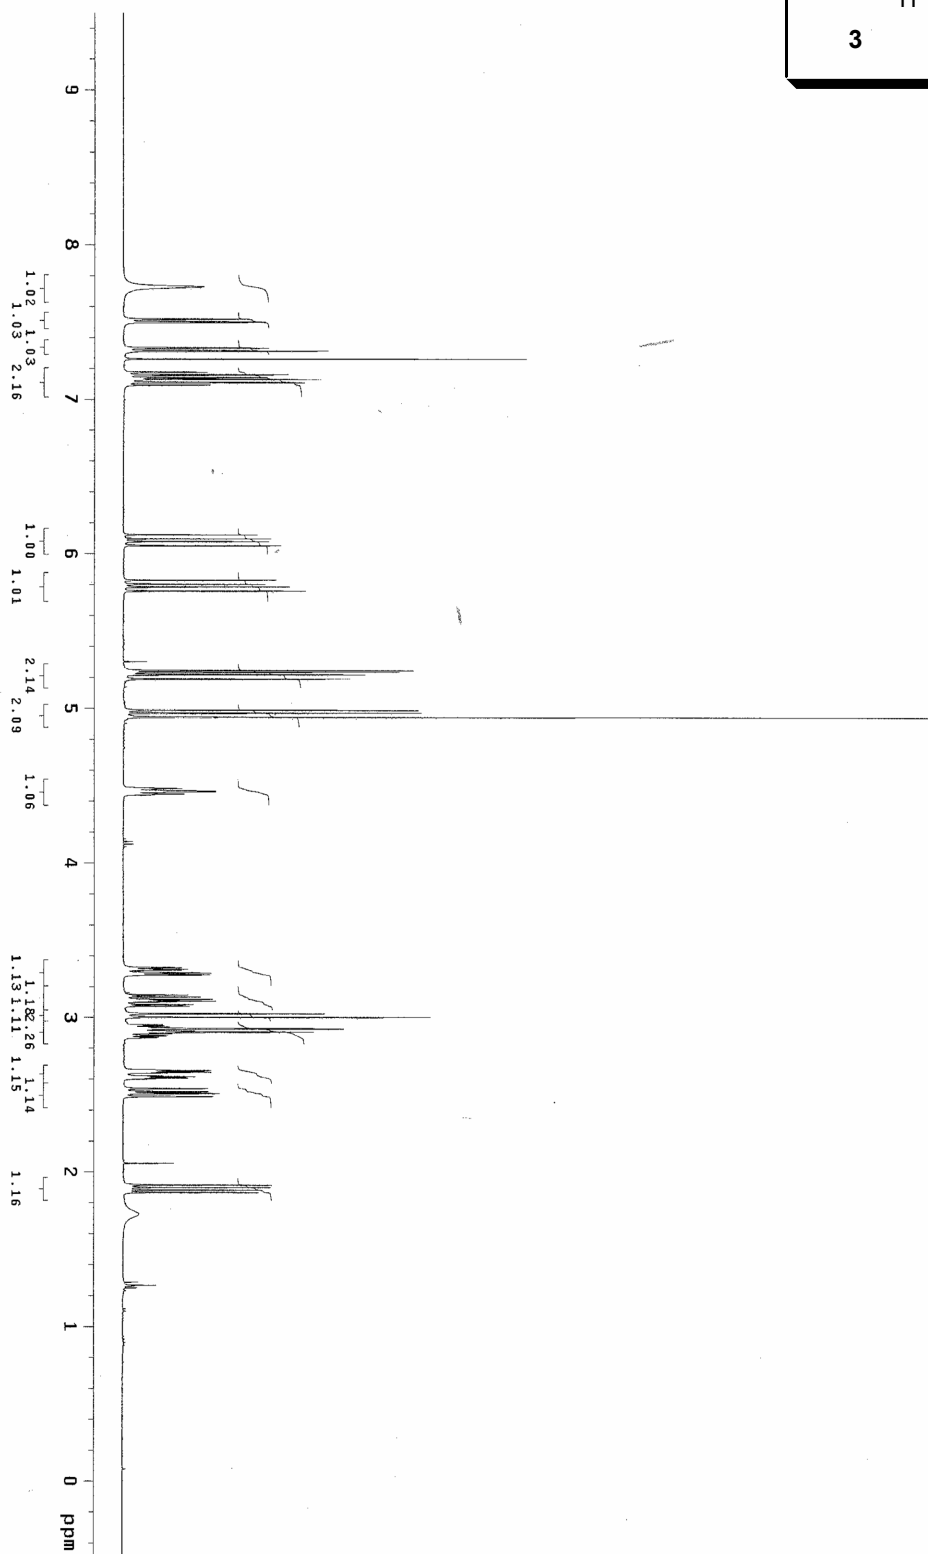

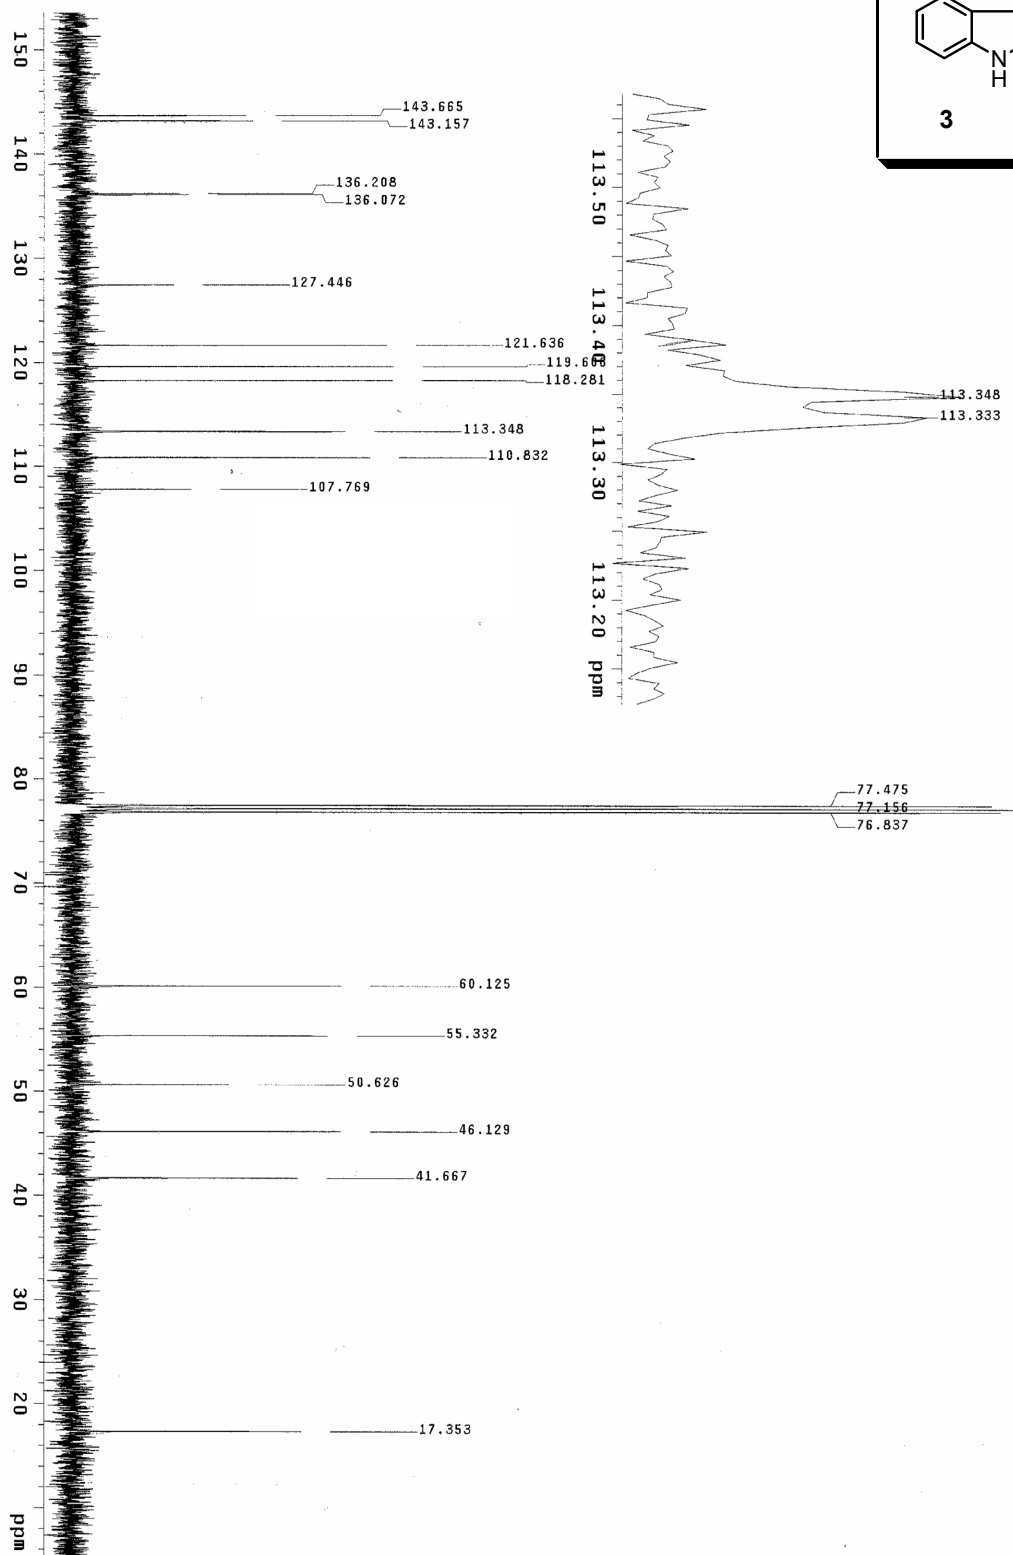



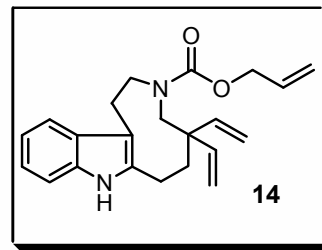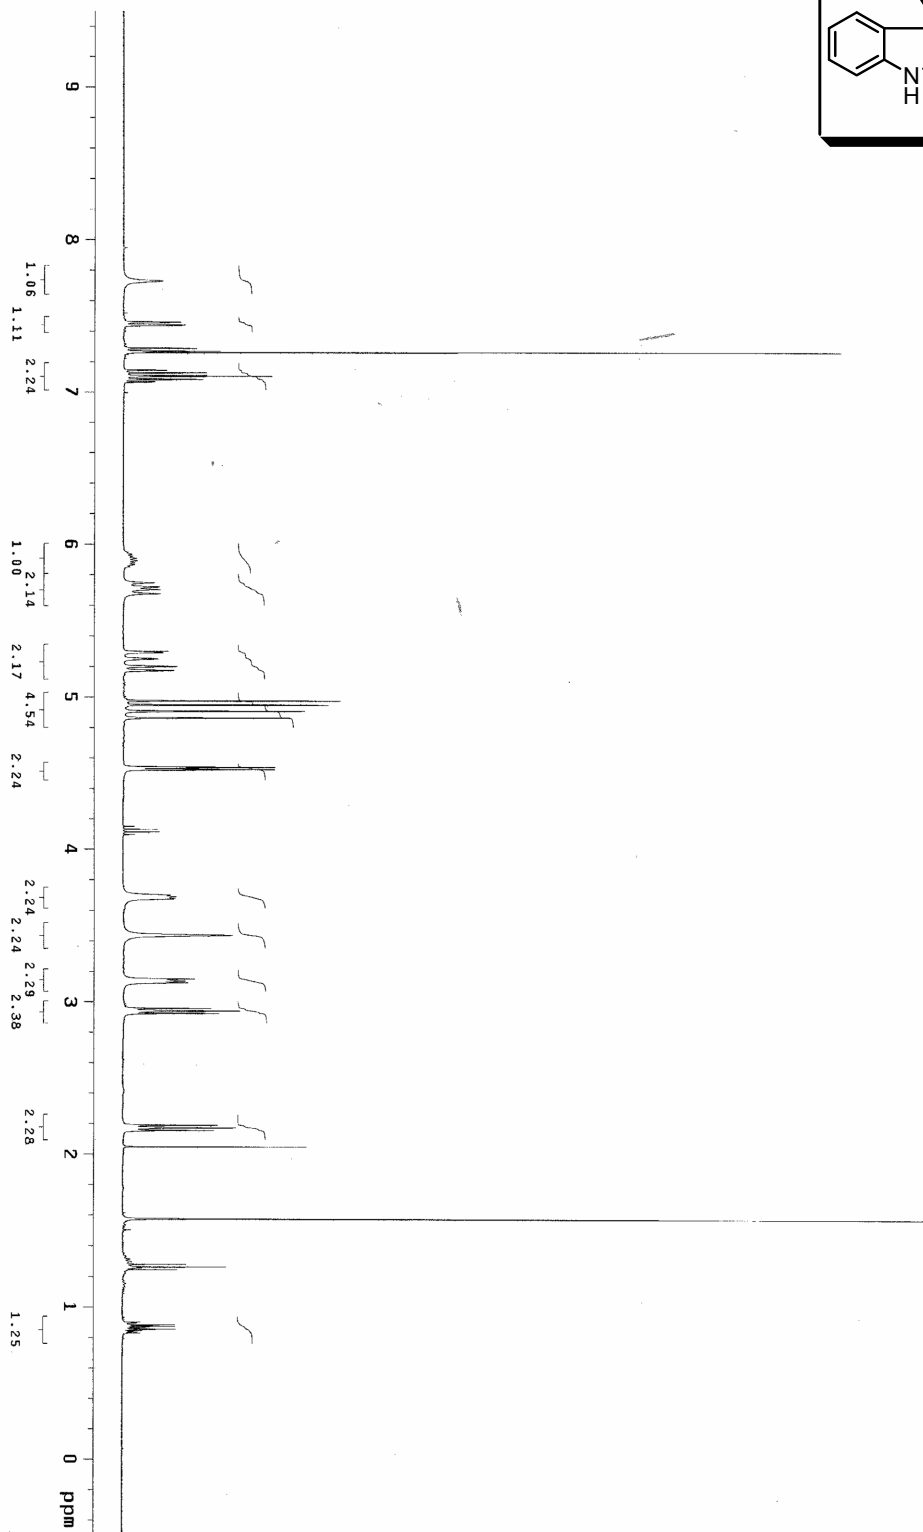

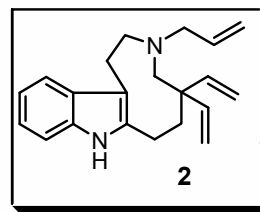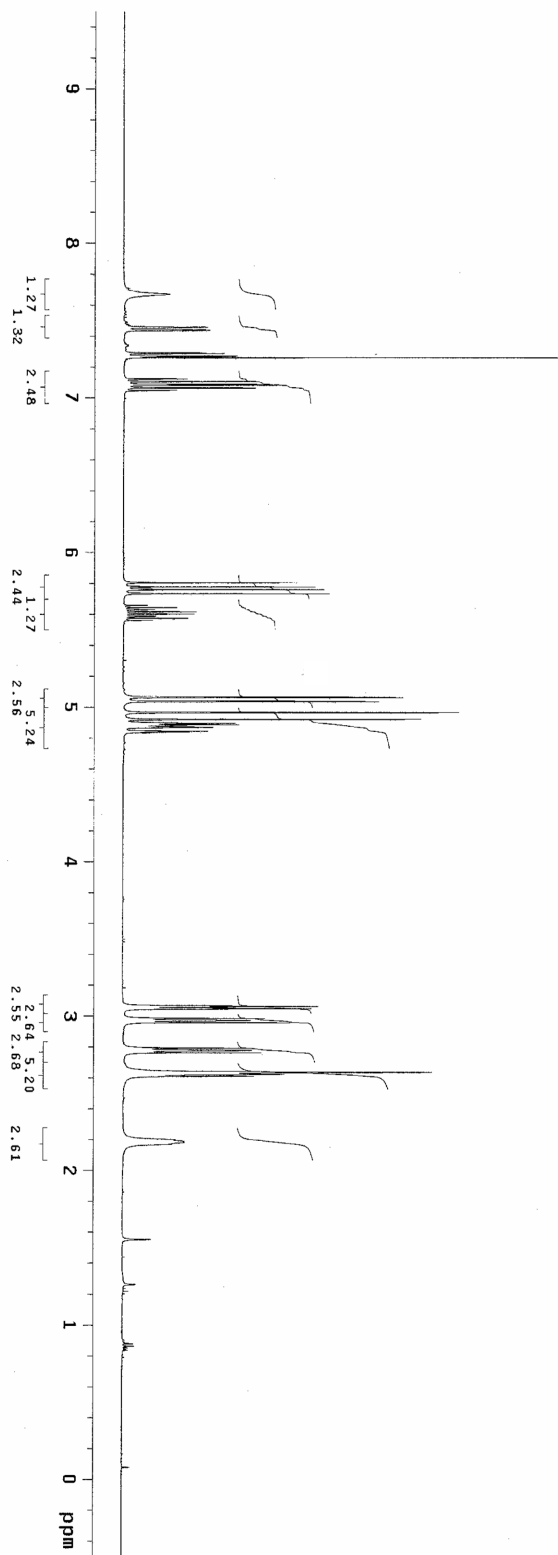

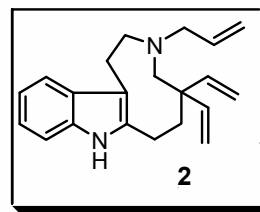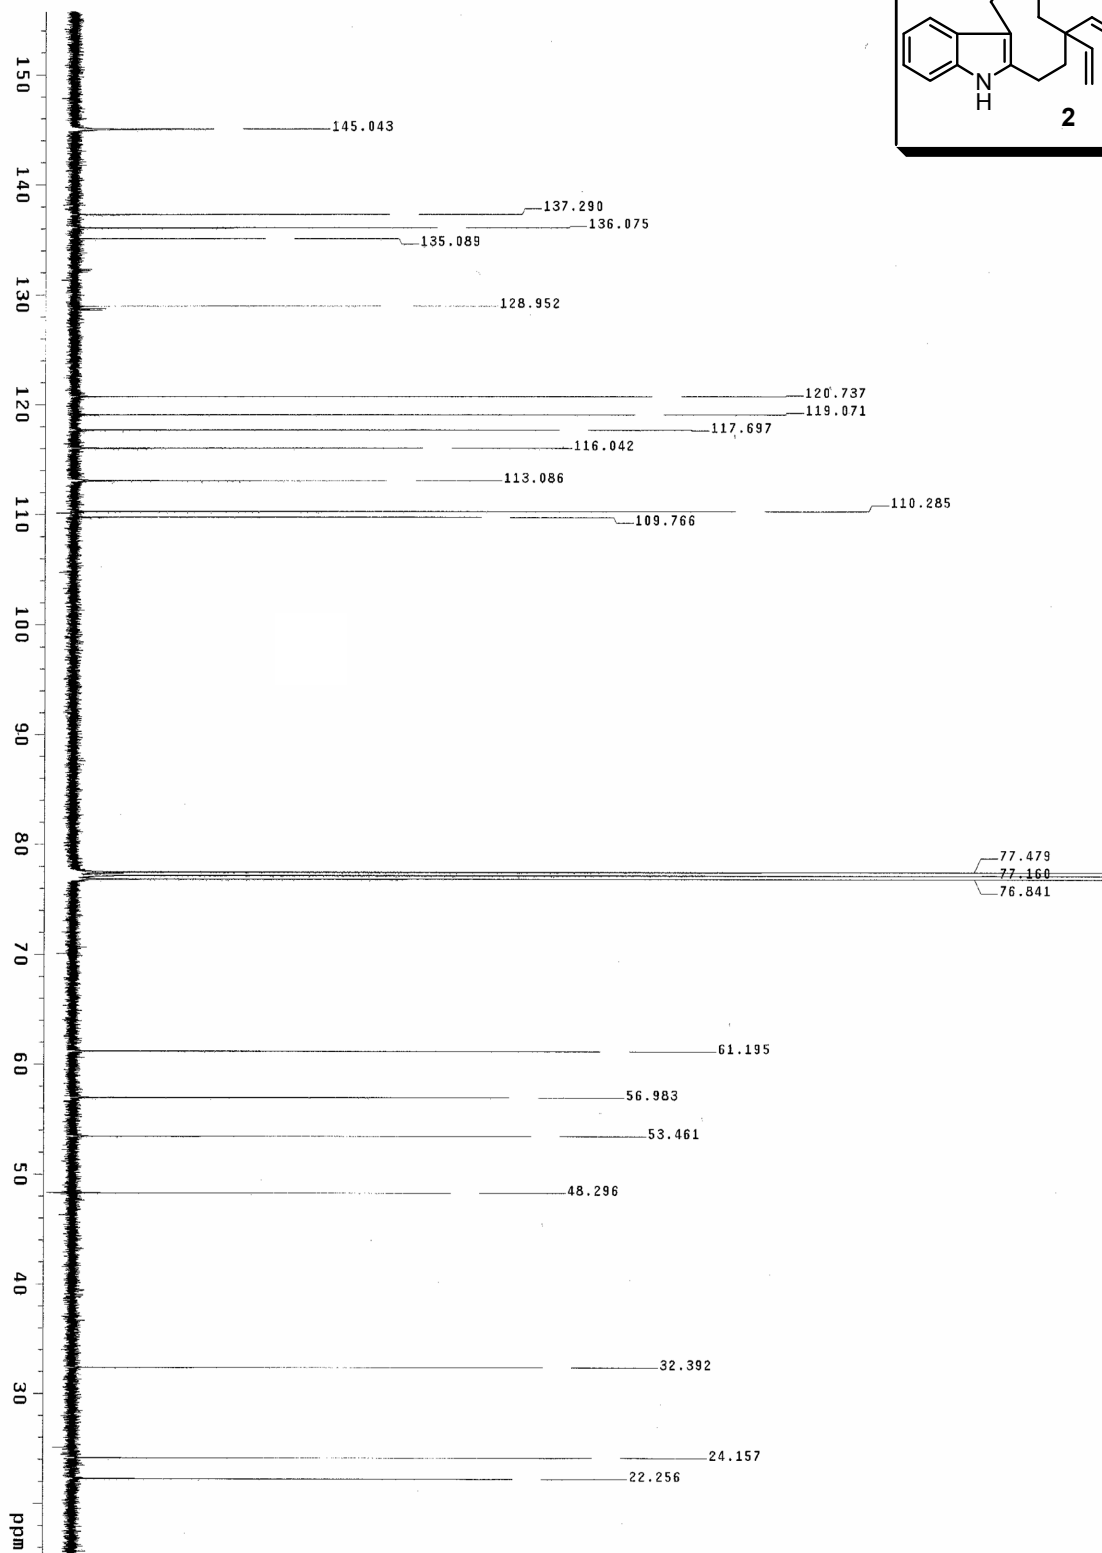

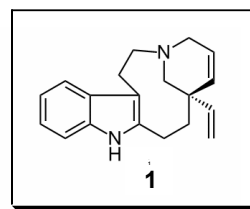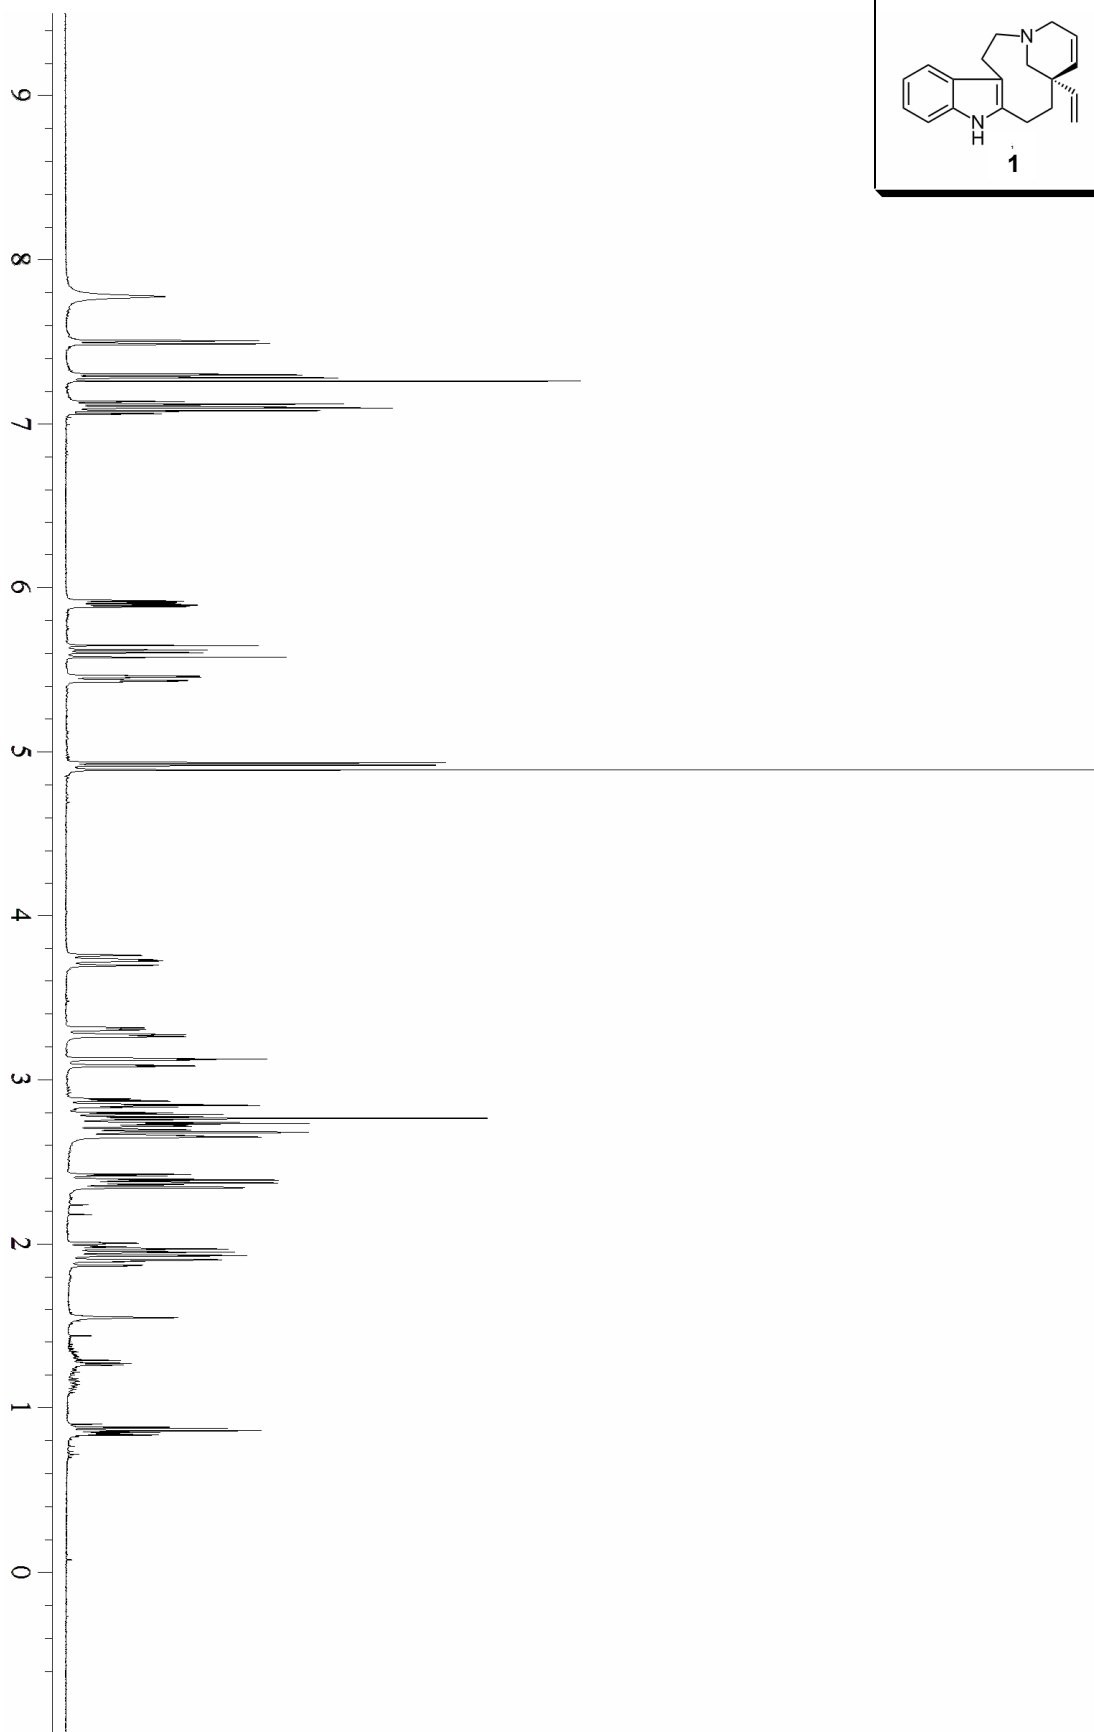

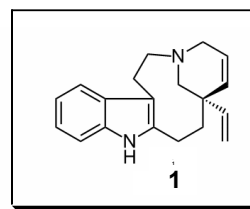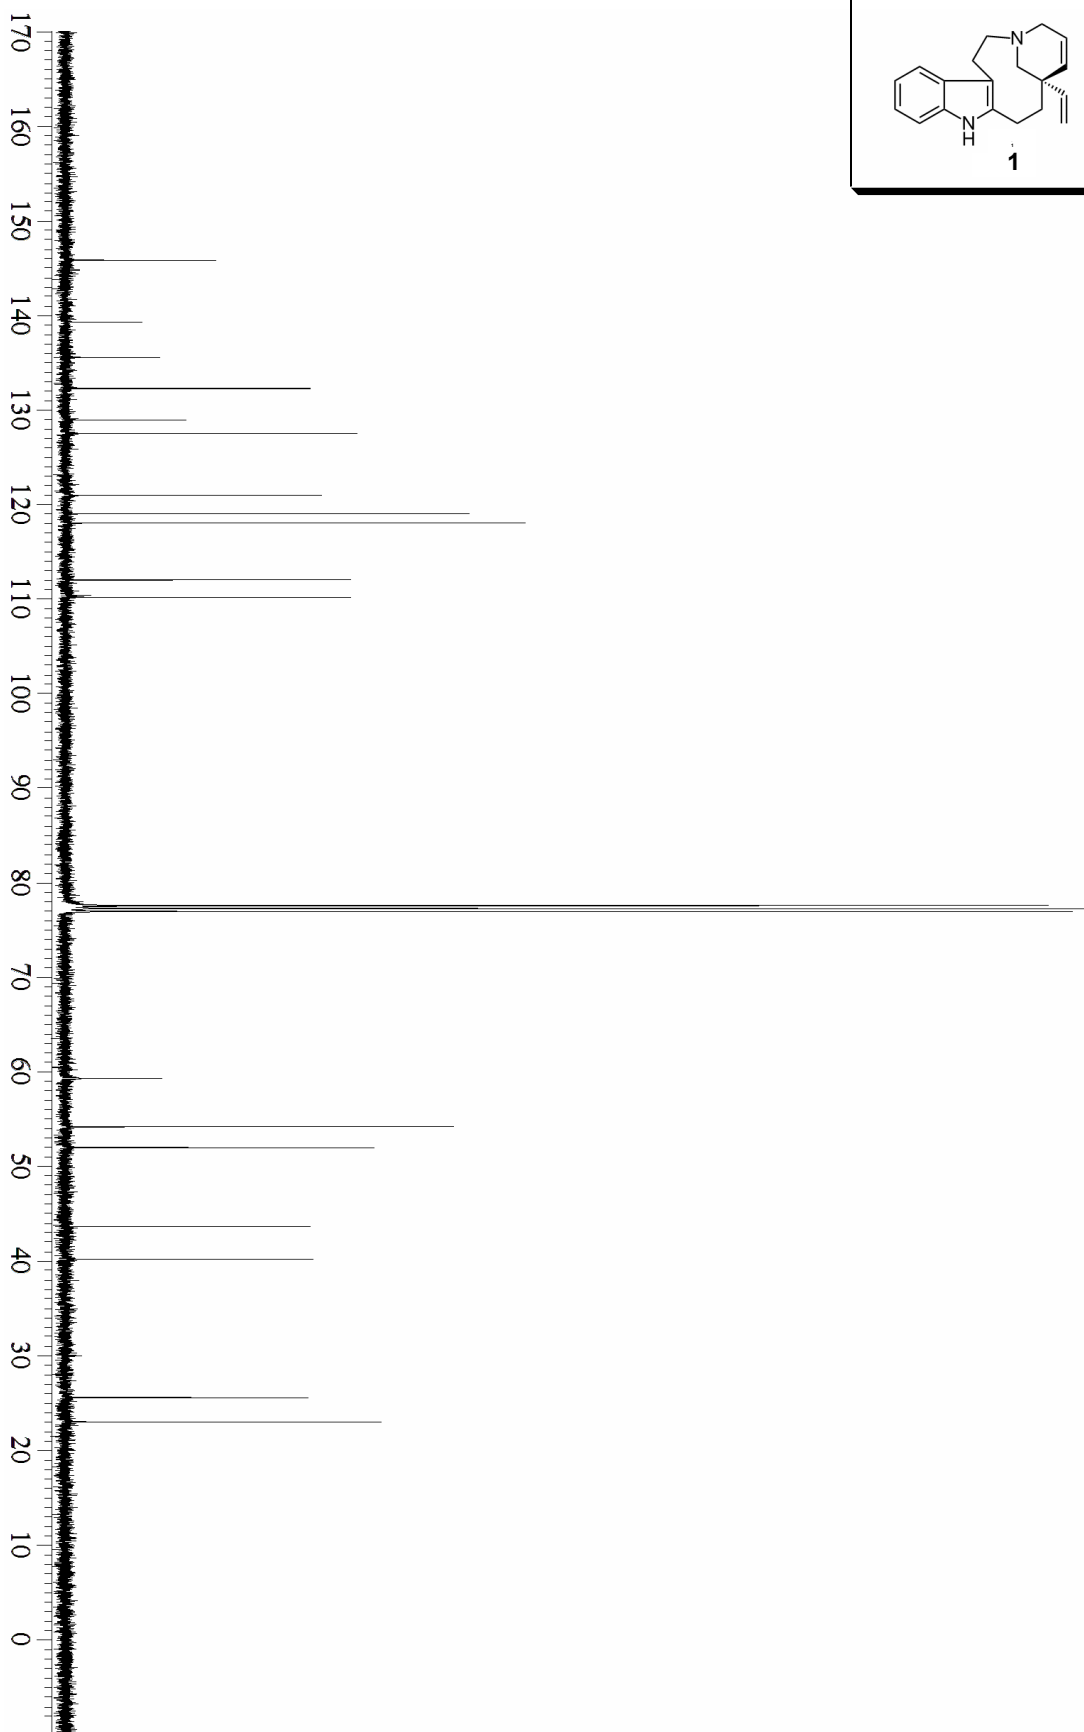

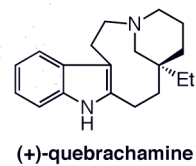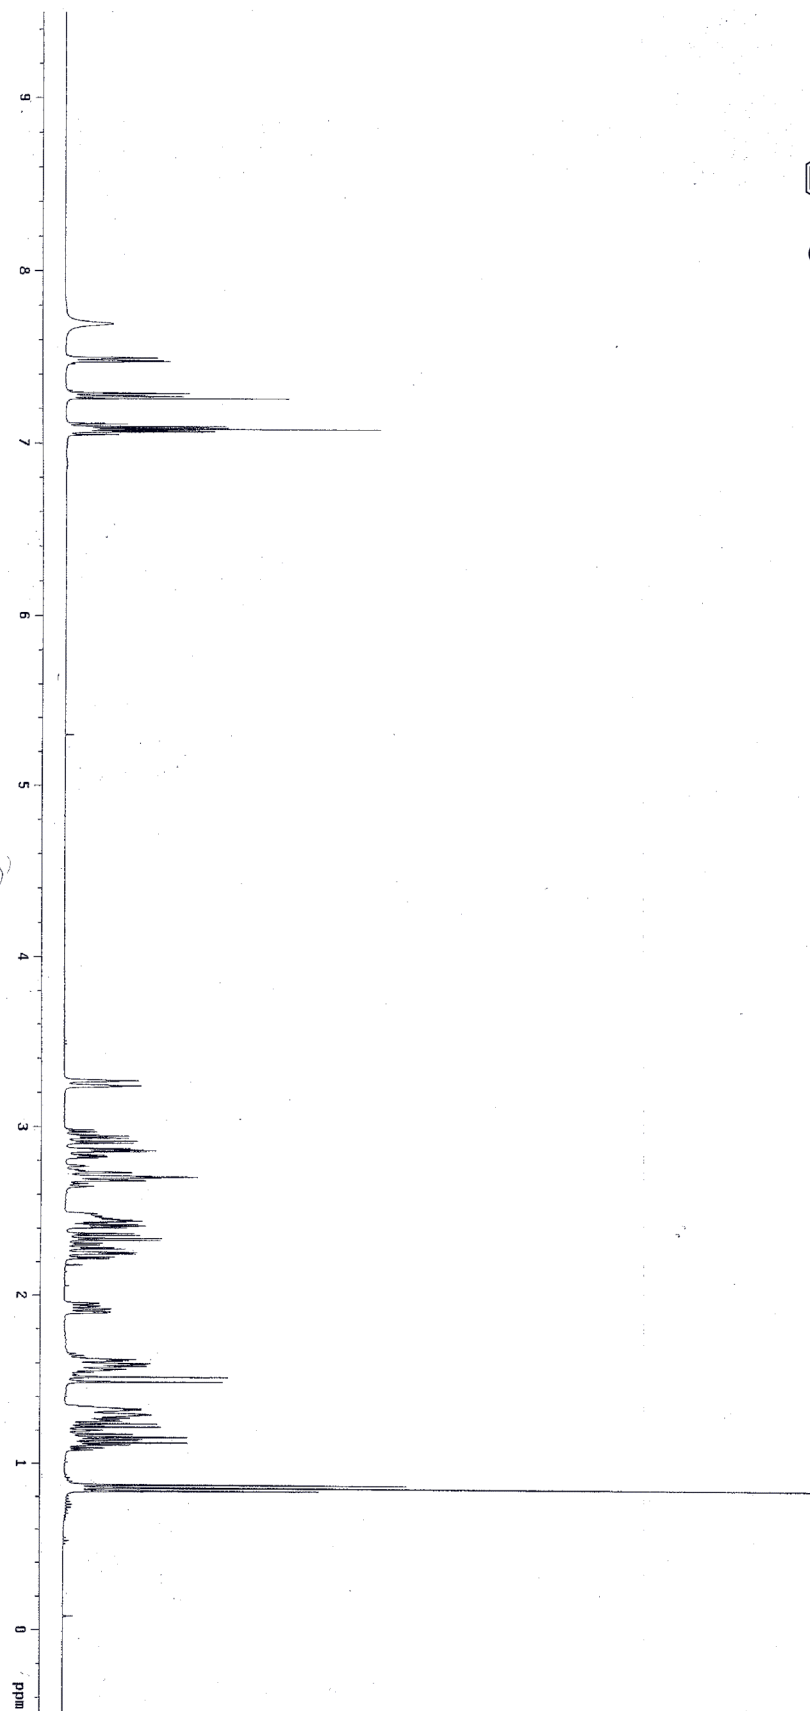

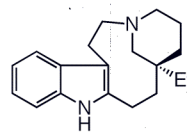

**(+)-quebrachamine**

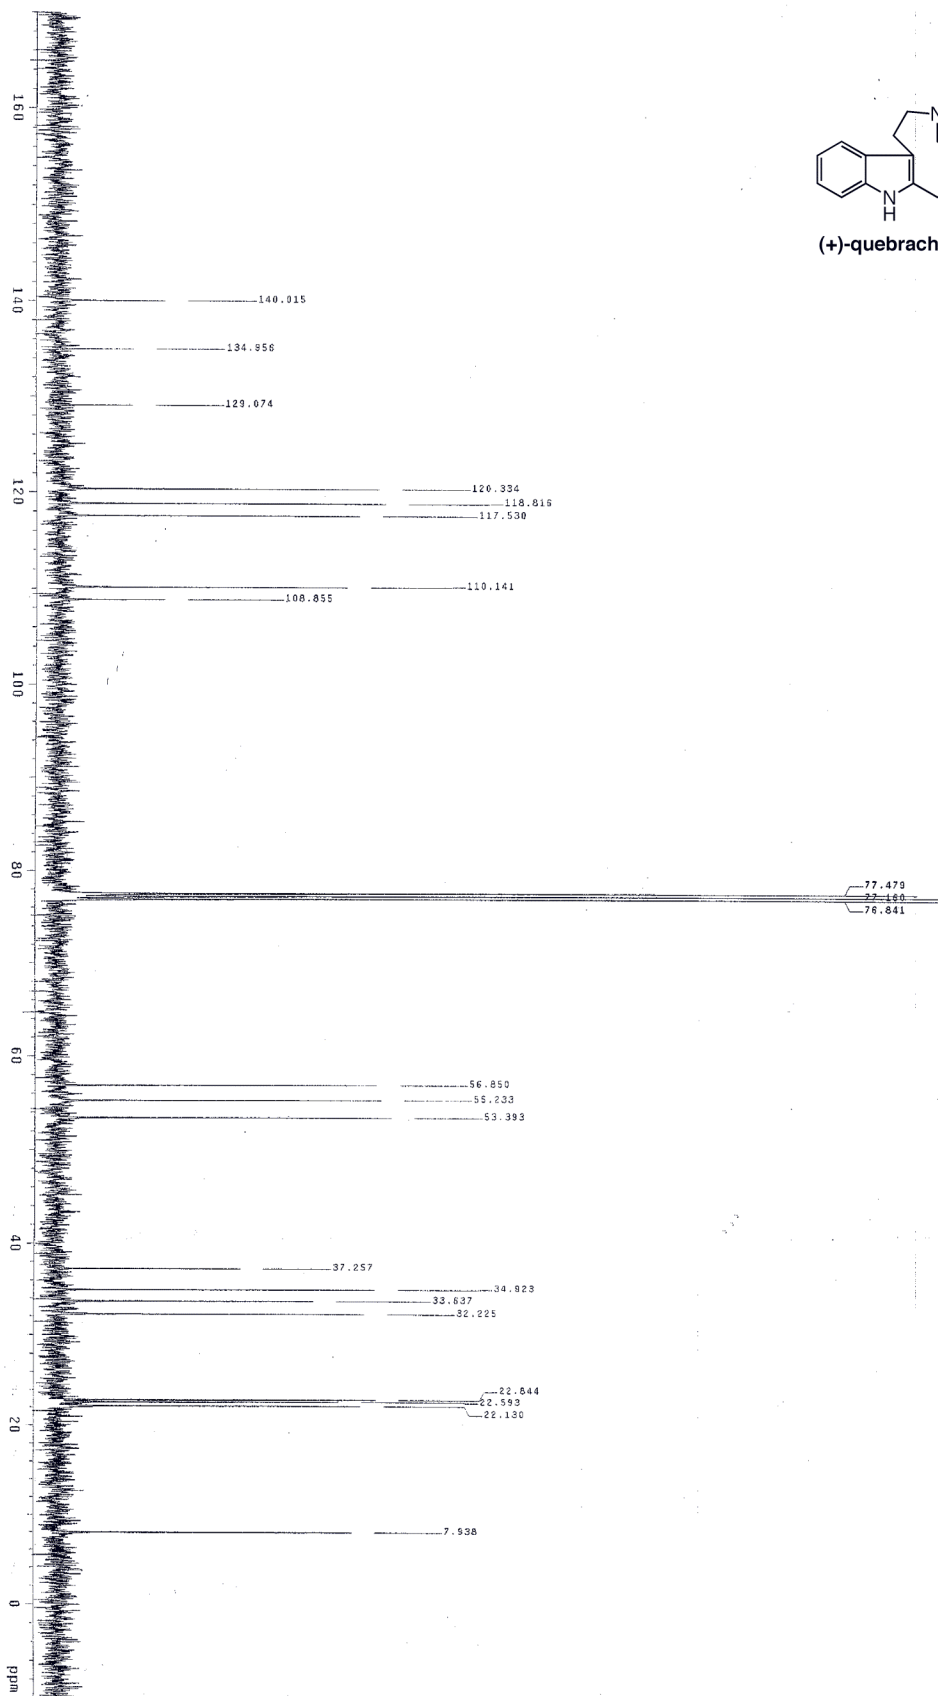

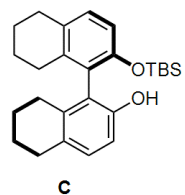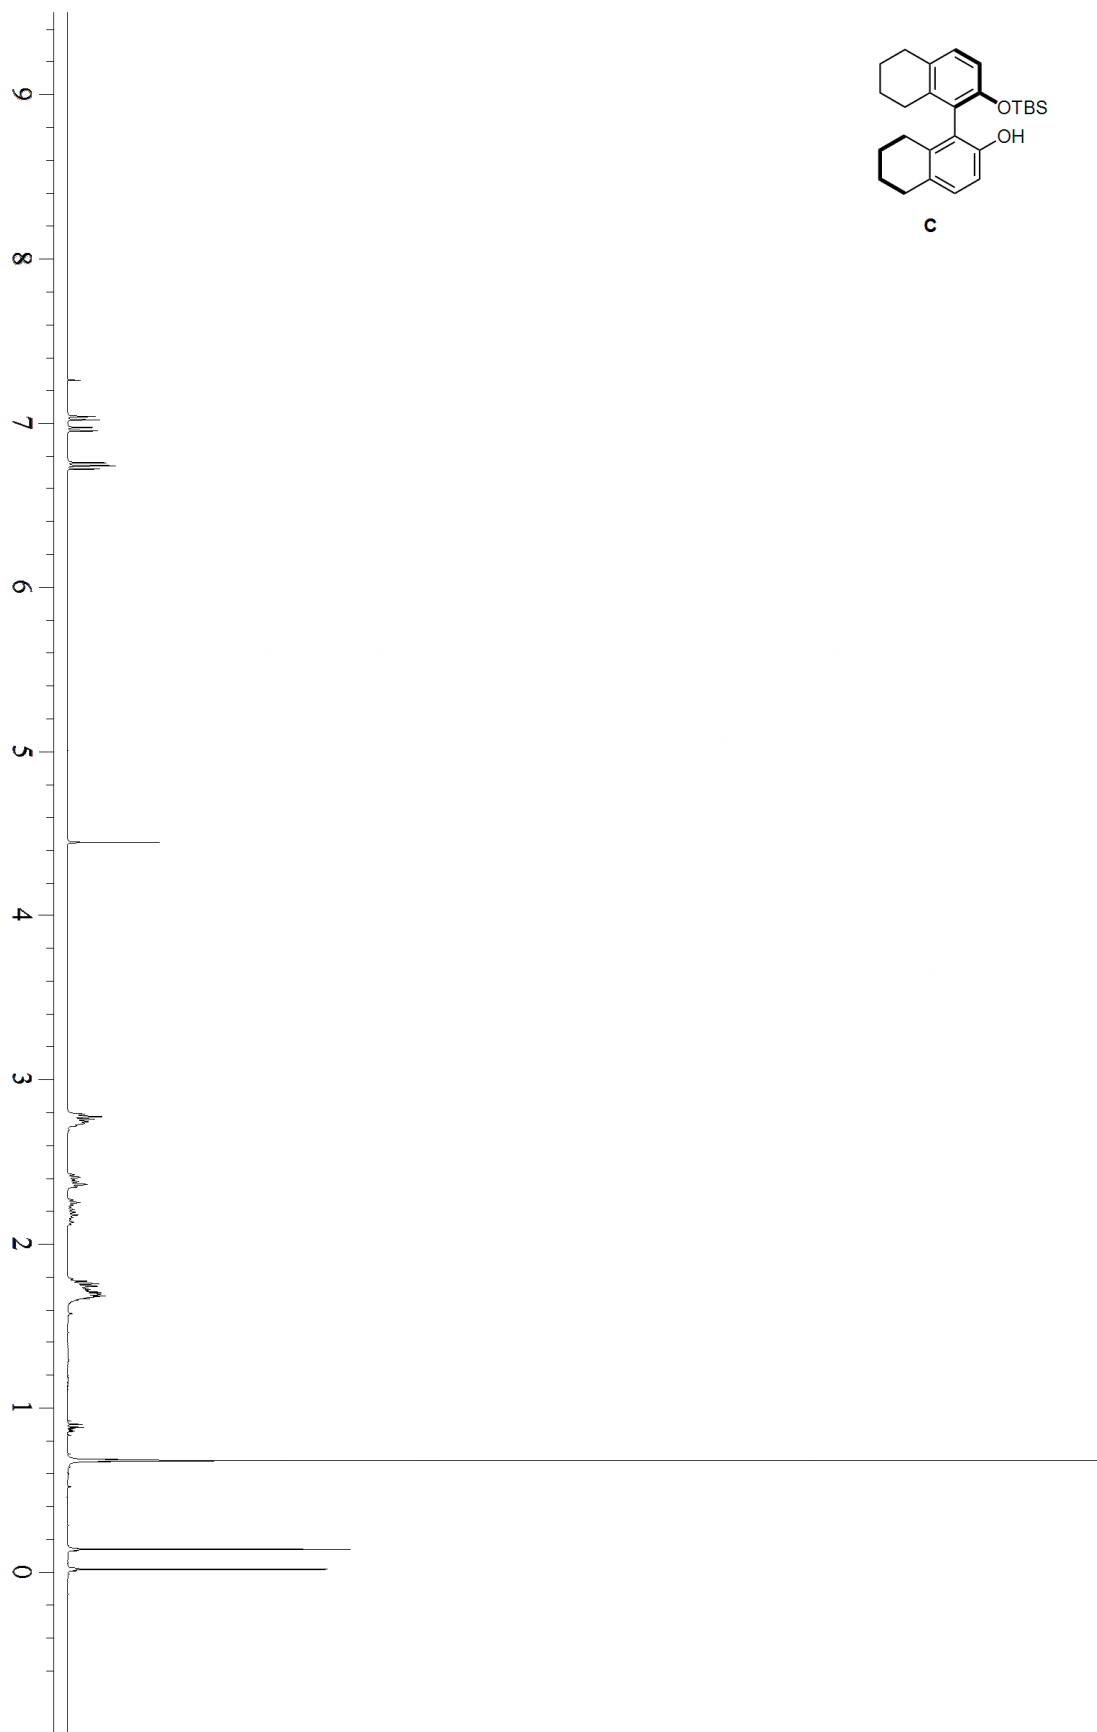



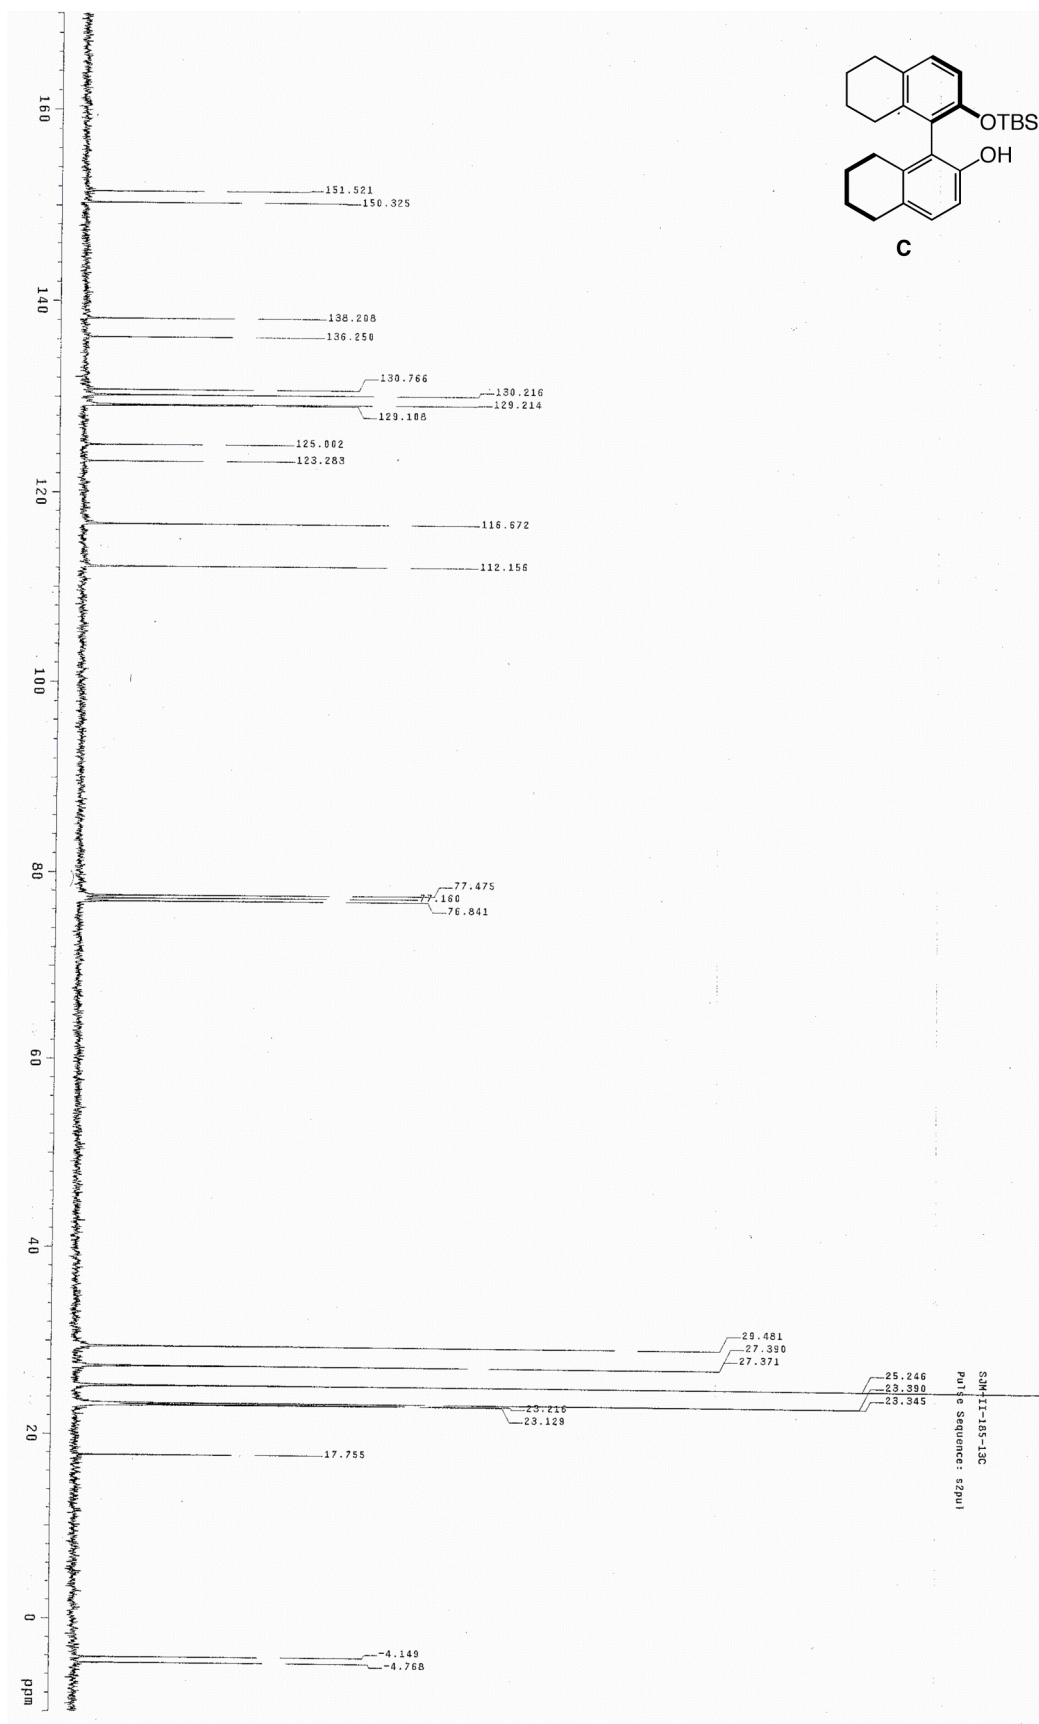

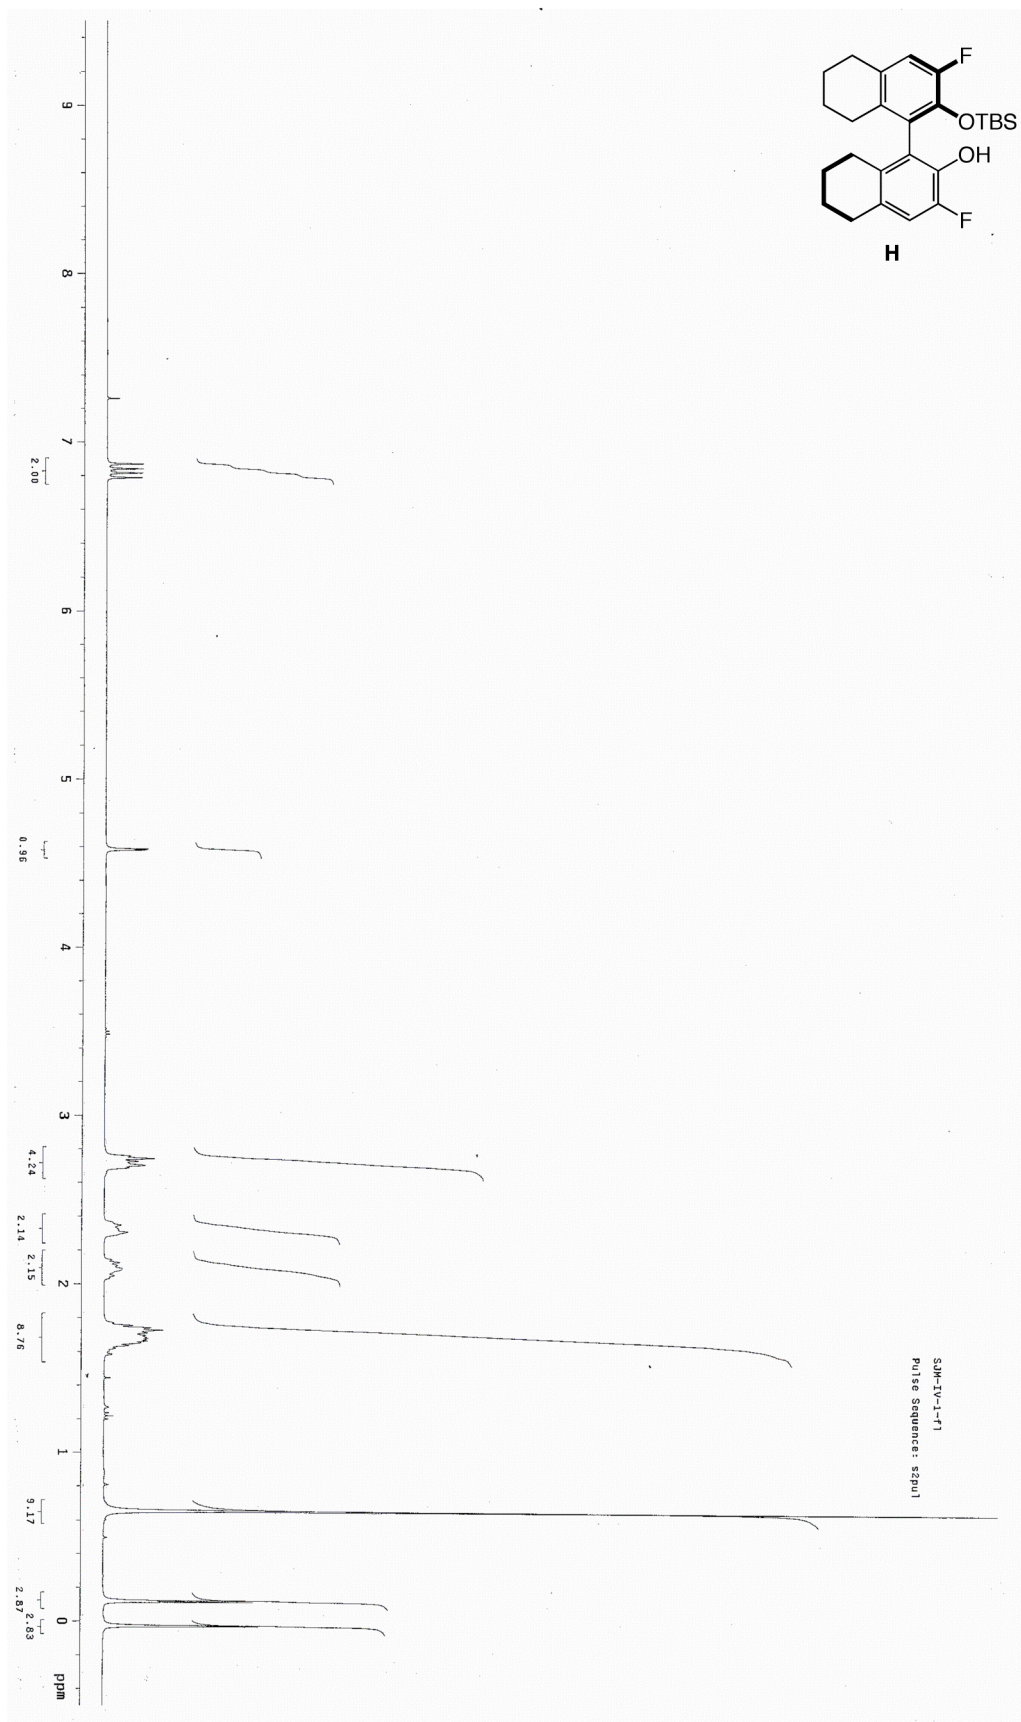

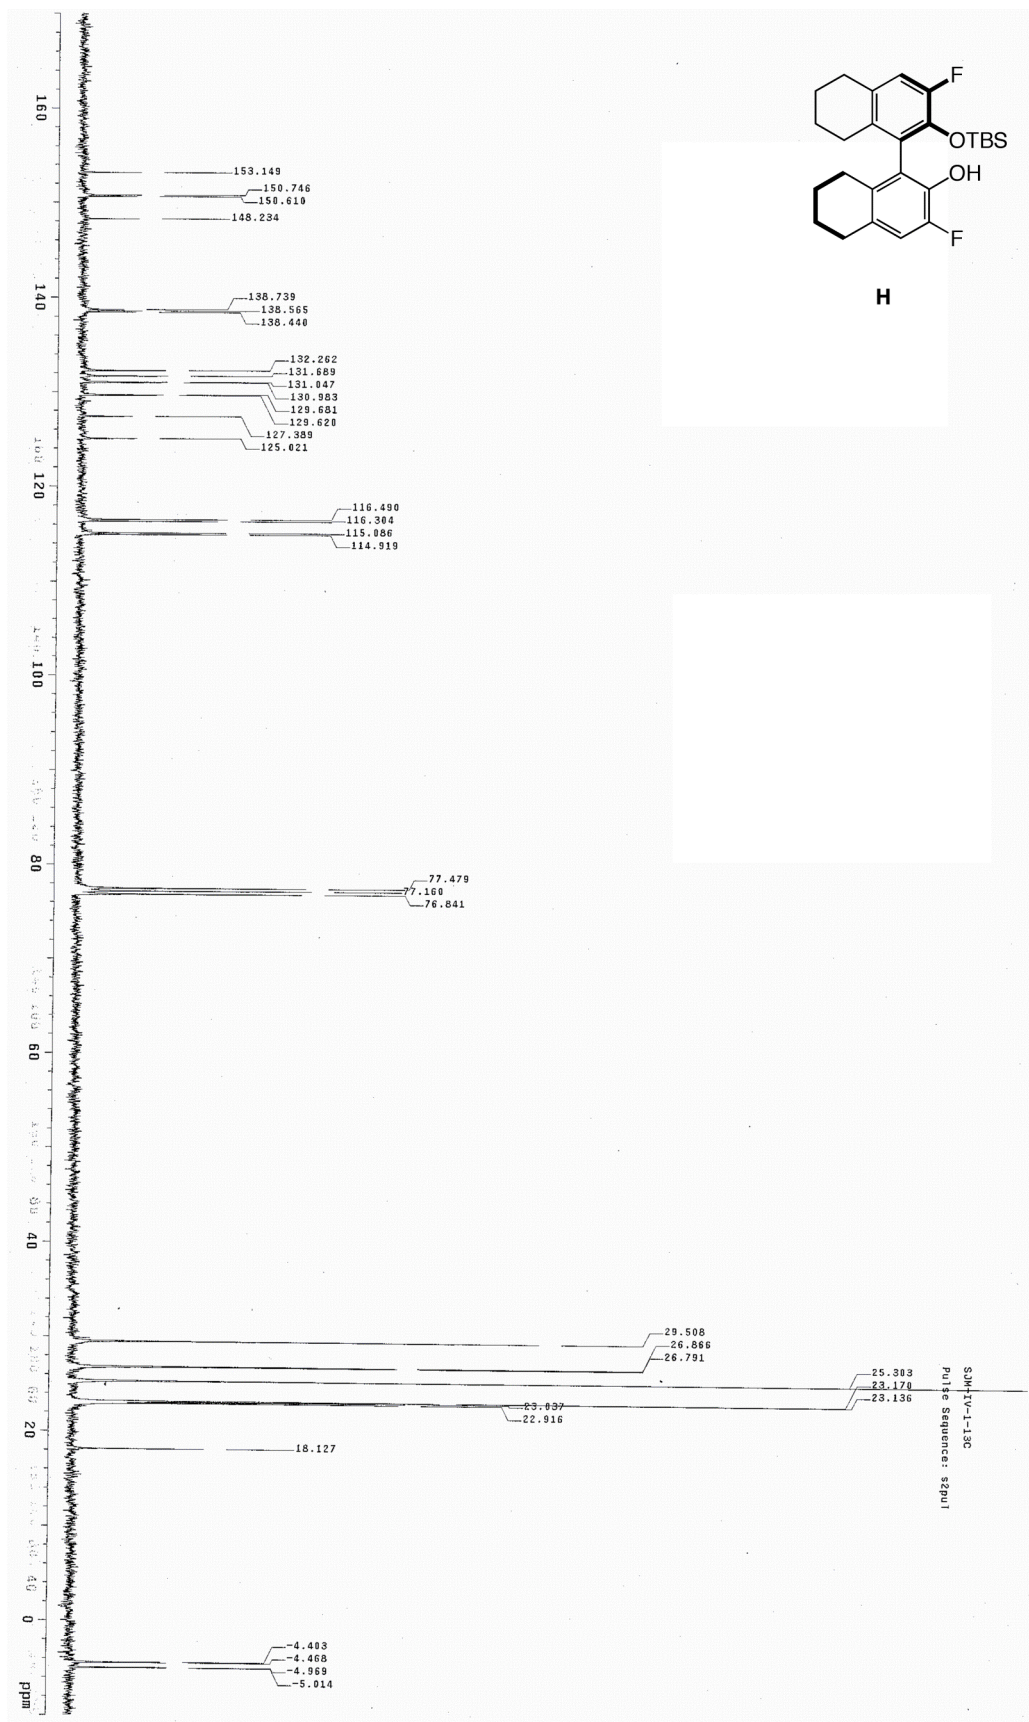

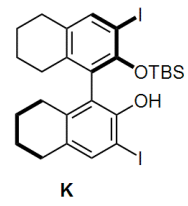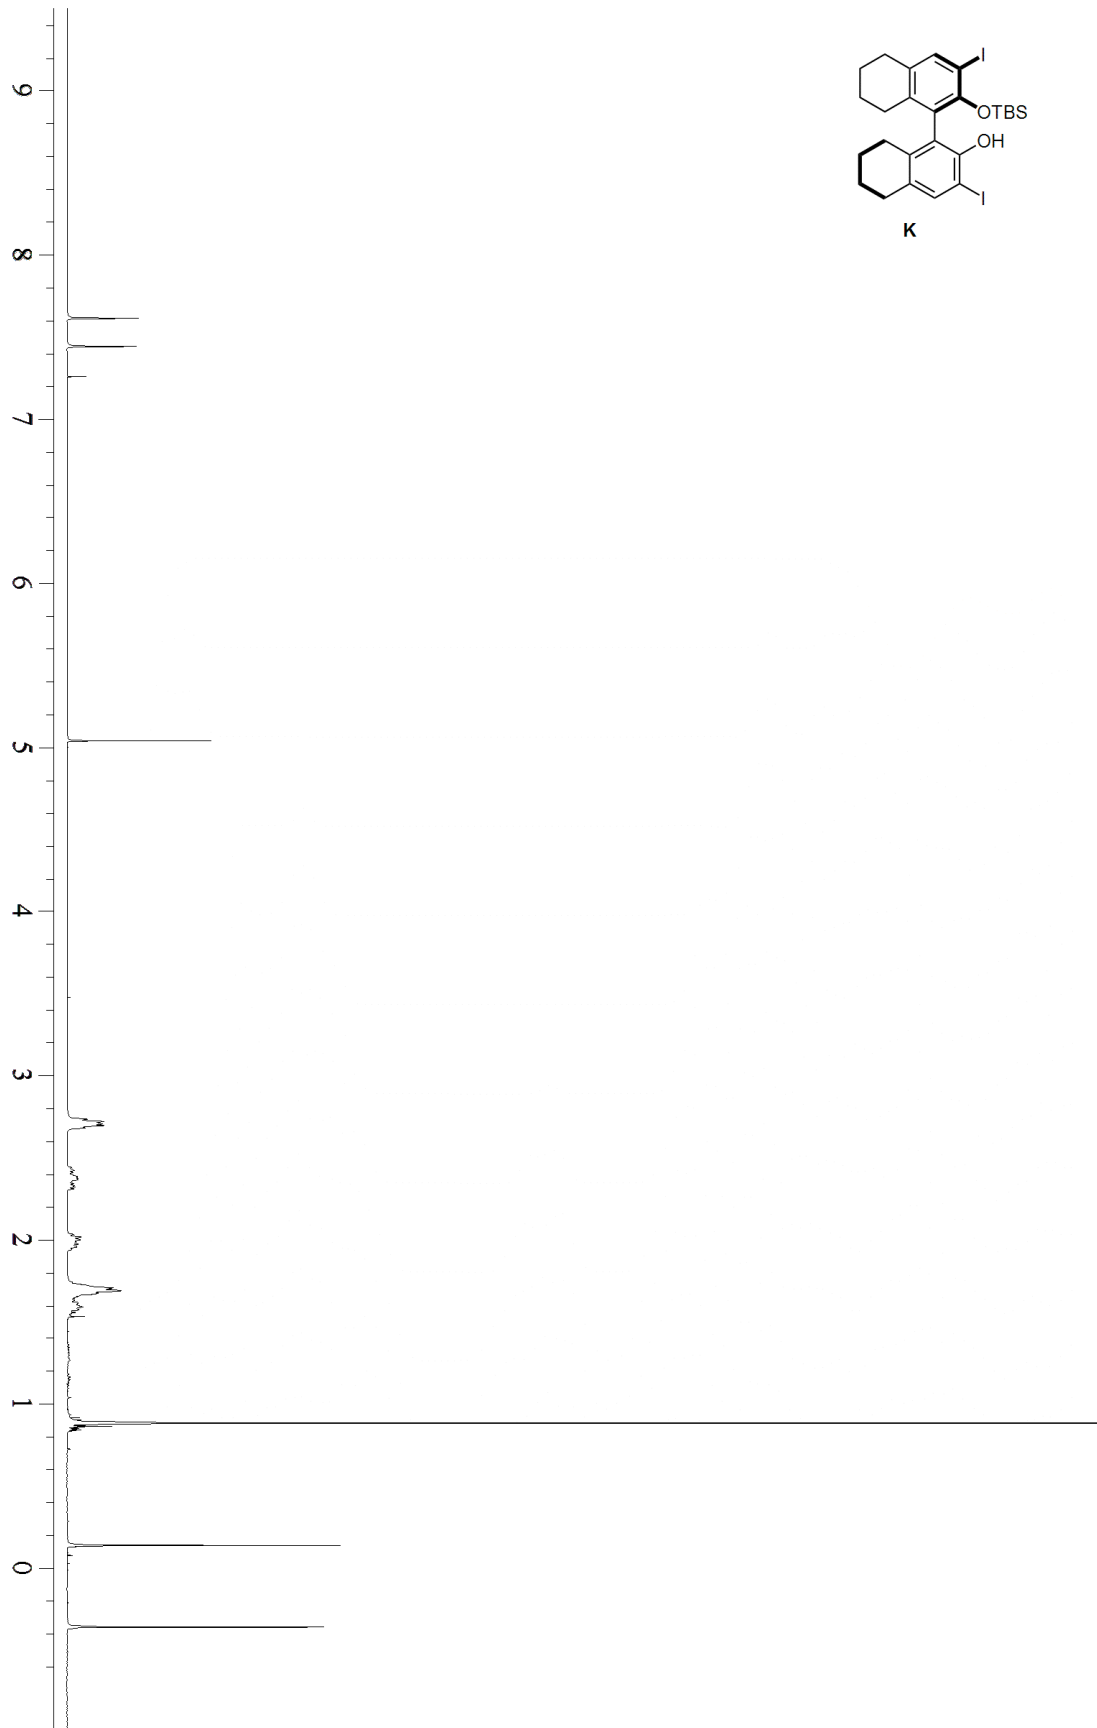

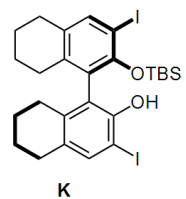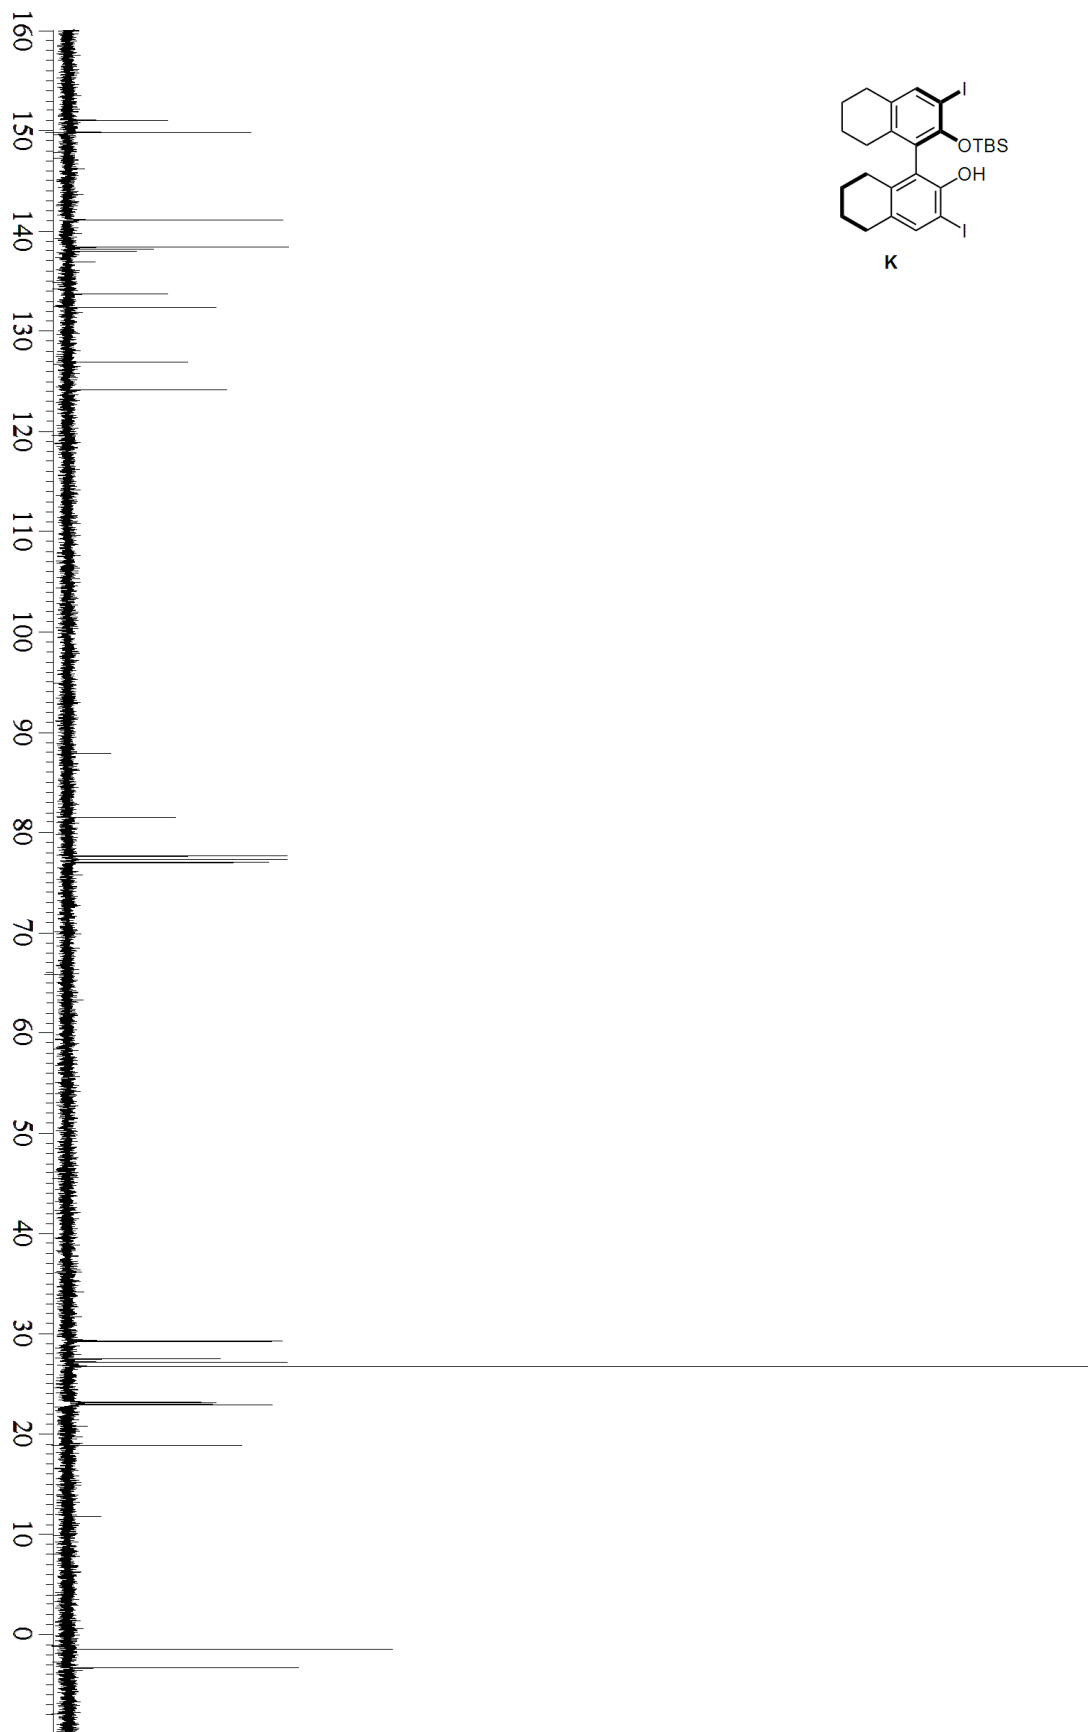

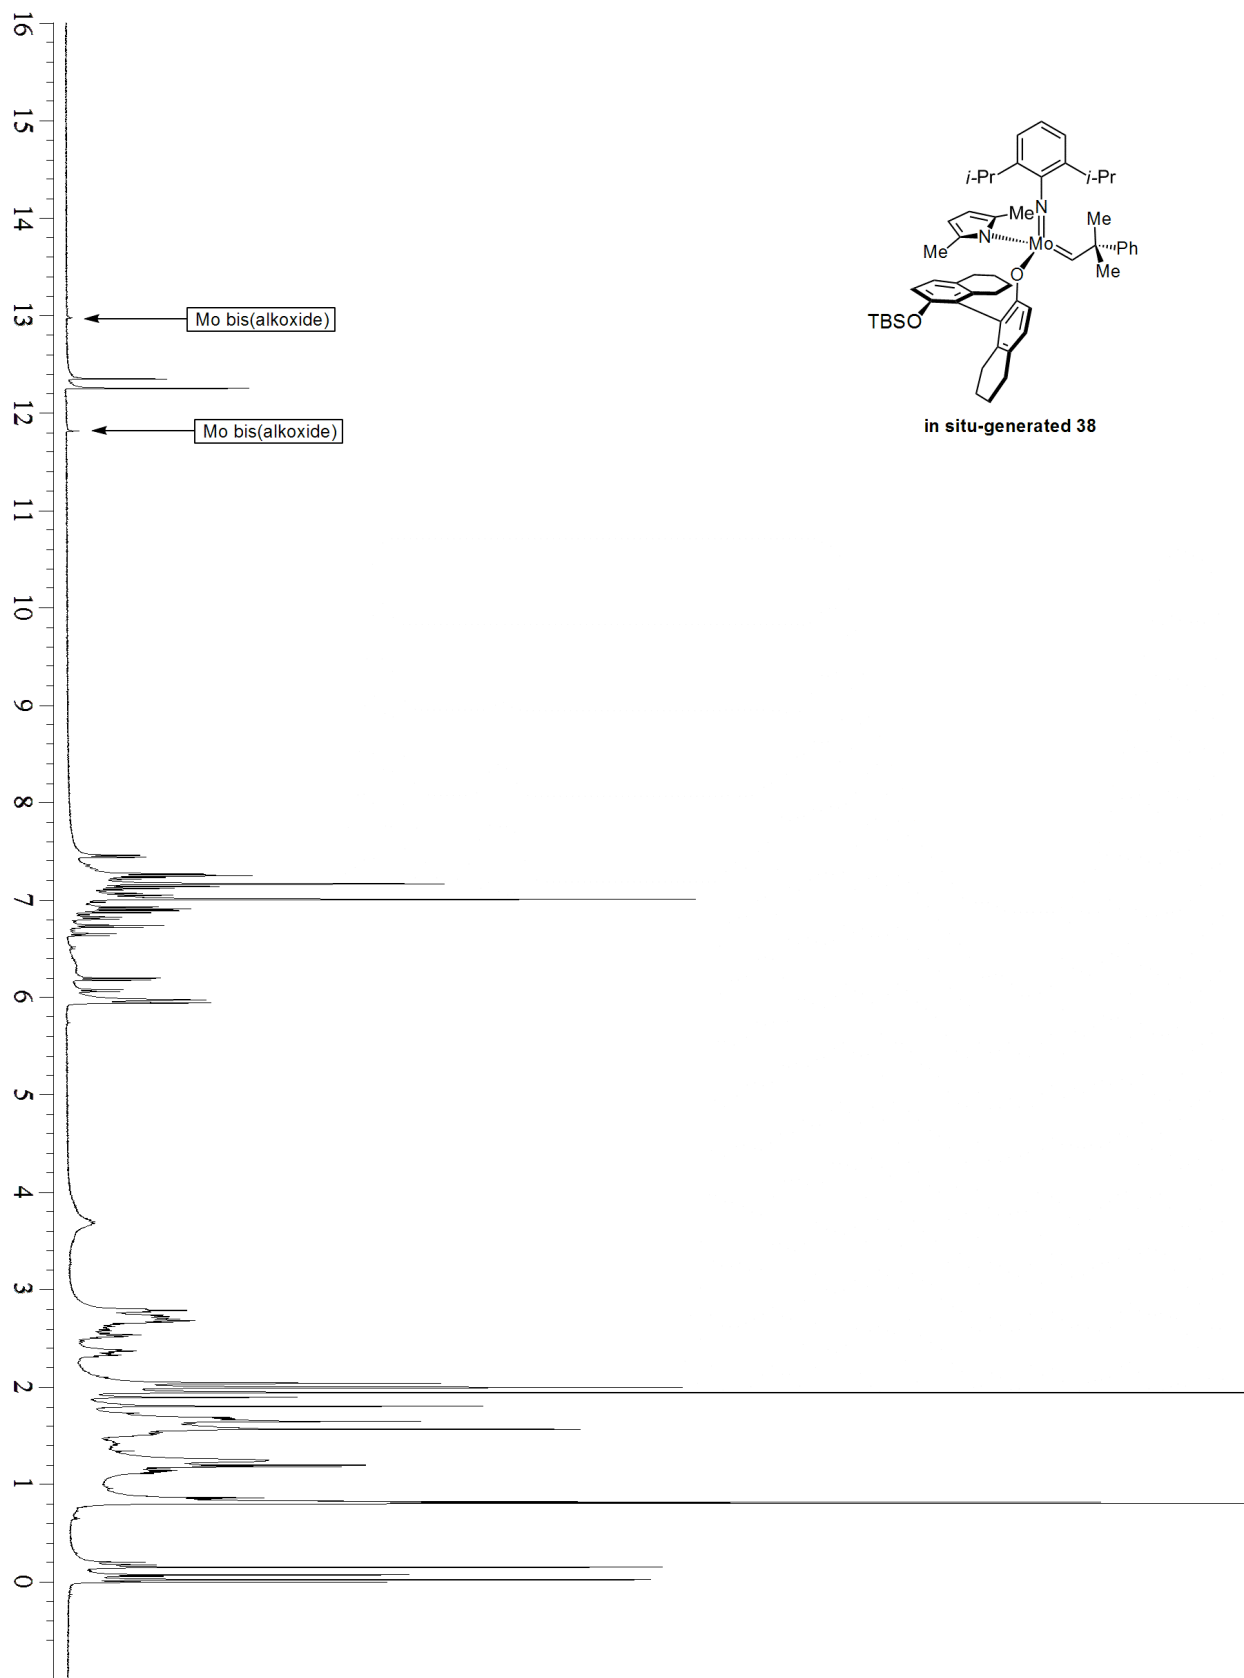

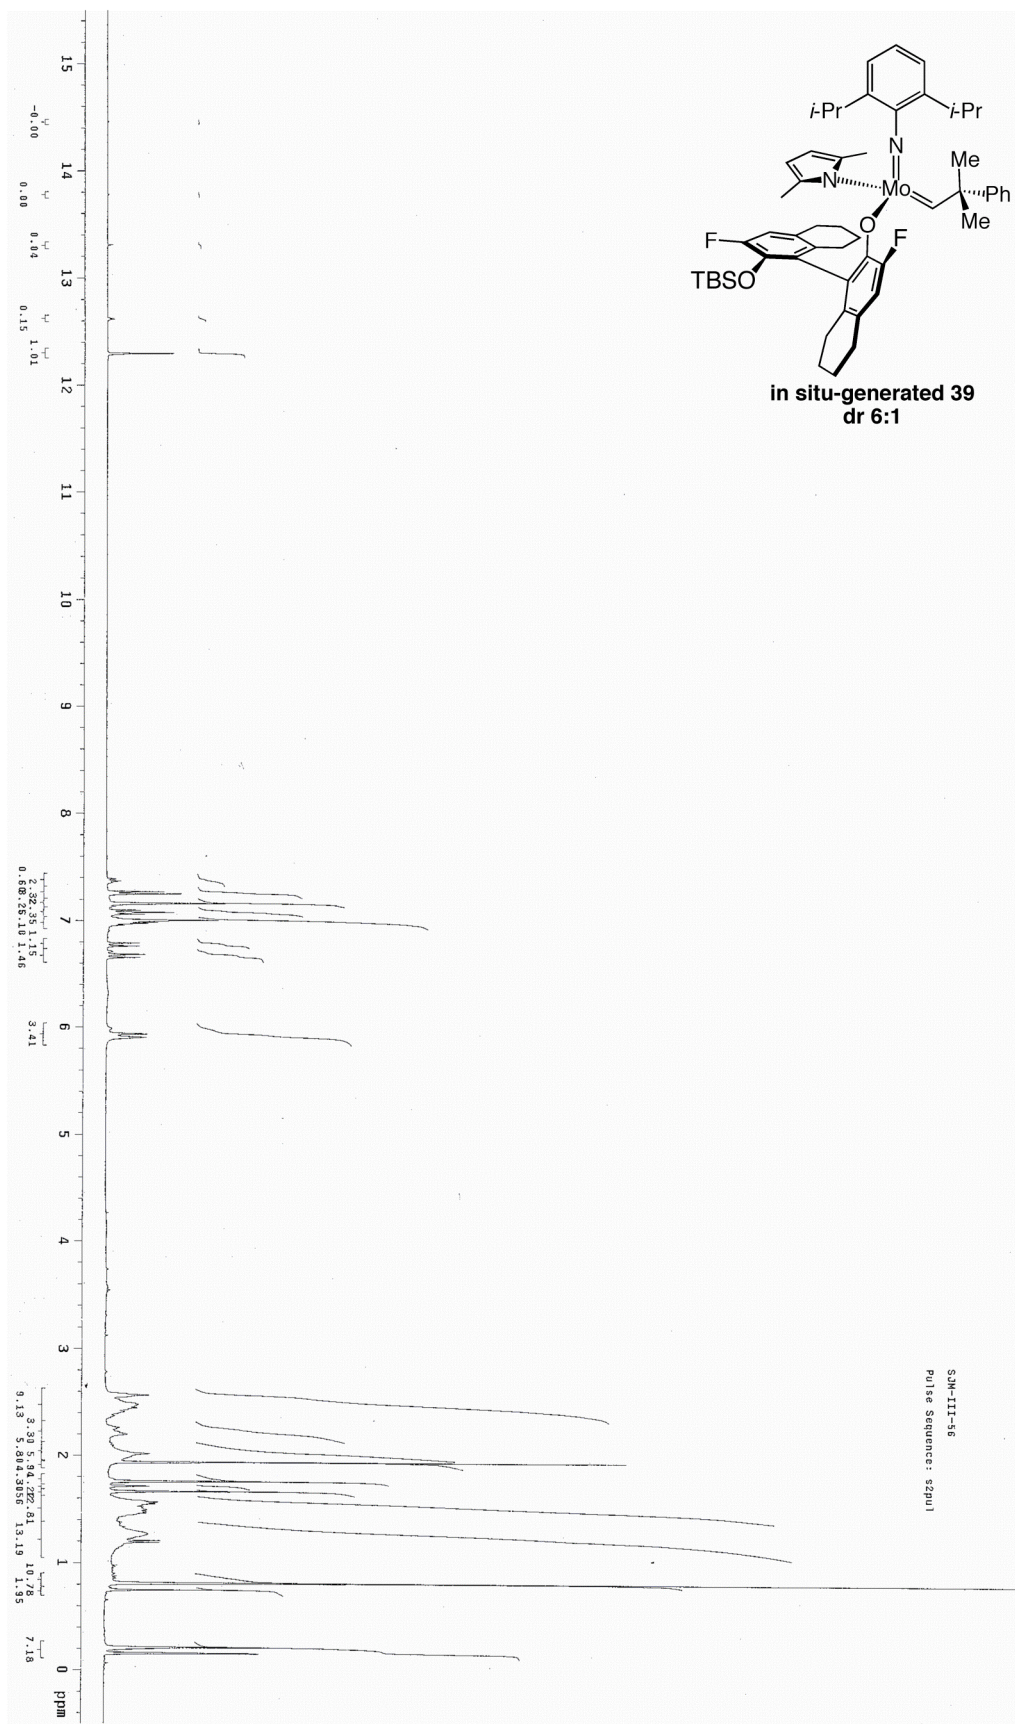

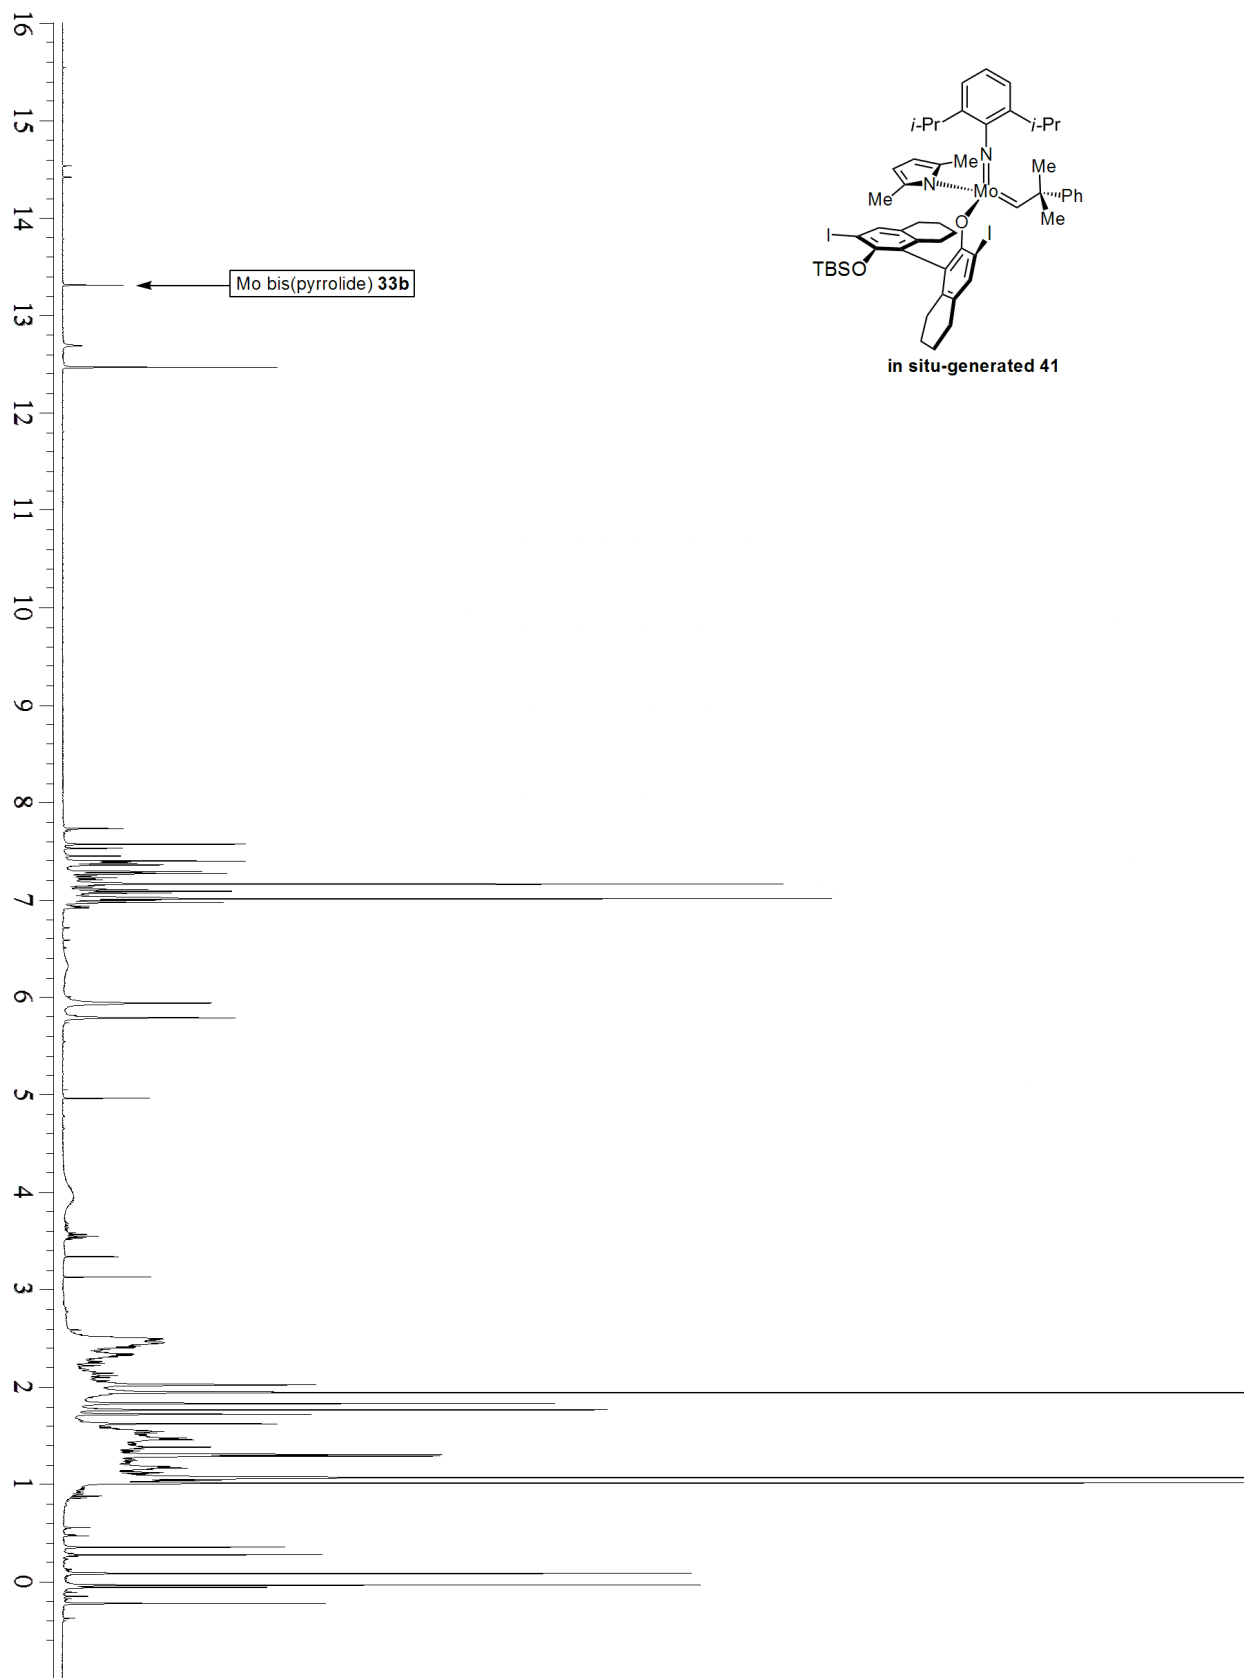

Supplement: NIHMS173130-supplement-supp_info_2.pdf [file NIHMS173130-supplement-supp_info_2.pdf]
